# Supplementary material for: Identification of Gene Expression Signatures in the Chicken Intestinal Intraepithelial Lymphocytes in Response to Herb Additive Supplementations
Source: PubMed Central journal article supplement — Asian-Australas J Anim Sci. 2015 Dec 23;29(10):1515–21. doi: 10.5713/ajas.15.0864 (PMC5003979; doi:10.5713/ajas.15.0864), 2015-12-23
Supplement: ajas-29-10-1515-supplementary.pdf [file ajas-29-10-1515-supplementary.pdf]

# **Identification of gene expression signatures in the chicken intestinal intraepithelial lymphocytes (IELs) in response to herb additive supplementations**

Supplemental Table 1. Detailed information for common DEGs was described.

| <b>Anethol</b>      |              |          |          |          |          |            |          |
|---------------------|--------------|----------|----------|----------|----------|------------|----------|
| <u>Up-regulated</u> |              |          |          |          |          |            |          |
| GeneName            | Agilent ID   | logFC    | AveExpr  | t        | P-Value  | Adj. P-Val | B        |
| GDF2                | A_87_P009507 | 3.588156 | 8.844506 | 9.330589 | 3.54E-05 | 0.048313   | 2.733757 |
| BU415738            | A_87_P027727 | 3.073602 | 6.845288 | 6.298285 | 0.000418 | 0.086348   | 0.593204 |
| BX277386            | A_87_P037368 | 2.85969  | 7.799524 | 6.398924 | 0.00038  | 0.086348   | 0.686047 |
| CO503580            | A_87_P041957 | 2.824056 | 7.078729 | 7.05126  | 0.00021  | 0.07965    | 1.225623 |
| CR386395            | A_87_P016505 | 2.756209 | 8.743256 | 6.313067 | 0.000412 | 0.086348   | 0.603324 |
| LOC419671           | A_87_P011329 | 2.742353 | 7.322559 | 7.092789 | 0.000202 | 0.079009   | 1.256861 |
| MDK                 | A_87_P029081 | 2.68125  | 7.159742 | 6.492546 | 0.000348 | 0.086348   | 0.757694 |
| TC198879            | A_87_P006998 | 2.6585   | 7.363867 | 7.105818 | 0.0002   | 0.079009   | 1.281987 |
| TC200204            | A_87_P006807 | 2.556263 | 8.072637 | 7.132555 | 0.000195 | 0.078983   | 1.294766 |
| CRH                 | A_87_P037220 | 2.540519 | 6.730633 | 6.833465 | 0.000254 | 0.083063   | 1.044728 |
| TC210123            | A_87_P003854 | 2.440955 | 8.914388 | 7.961465 | 9.79E-05 | 0.067942   | 1.89888  |
| CR390040            | A_87_P014407 | 2.430733 | 8.328124 | 6.019467 | 0.000548 | 0.090346   | 0.334332 |
| BU479212            | A_87_P025451 | 2.421219 | 8.588658 | 5.71204  | 0.000746 | 0.097039   | 0.041887 |
| BU226241            | A_87_P032548 | 2.409227 | 6.561791 | 6.271577 | 0.000428 | 0.086348   | 0.563639 |
| CR390009            | A_87_P014428 | 2.405584 | 9.182793 | 7.631772 | 0.000128 | 0.075518   | 1.656898 |
| APOB                | A_87_P022123 | 2.403839 | 8.427088 | 5.058336 | 0.0015   | 0.115403   | -0.3911  |
| CR386893            | A_87_P016179 | 2.398479 | 9.32154  | 7.959767 | 9.81E-05 | 0.067942   | 1.887938 |
| OPCML               | A_87_P037717 | 2.371633 | 6.824025 | 6.41061  | 0.000375 | 0.086348   | 0.687815 |
| BU423426            | A_87_P027415 | 2.369735 | 10.30395 | 6.598943 | 0.000315 | 0.085477   | 0.850419 |
| TC186301            | A_87_P008359 | 2.357052 | 14.53735 | 6.271982 | 0.000428 | 0.086348   | 0.574459 |
| CN236254            | A_87_P020473 | 2.351936 | 7.208837 | 6.6739   | 0.000294 | 0.085477   | 0.916488 |

|              |              |          |          |          |          |          |          |
|--------------|--------------|----------|----------|----------|----------|----------|----------|
| BU247950     | A_87_P031712 | 2.347479 | 9.674958 | 6.57894  | 0.000321 | 0.085477 | 0.835869 |
| TC194119     | A_87_P007570 | 2.314791 | 8.275533 | 6.016172 | 0.000549 | 0.090346 | 0.333665 |
| FZR1         | A_87_P037626 | 2.299591 | 15.15082 | 7.268558 | 0.000174 | 0.076686 | 1.394834 |
| M27663       | A_87_P009373 | 2.255433 | 7.924457 | 7.279008 | 0.000172 | 0.076686 | 1.403311 |
| CR406944     | A_87_P012419 | 2.21909  | 7.435867 | 6.490538 | 0.000348 | 0.086348 | 0.757147 |
| BU104894     | A_87_P034768 | 2.207061 | 6.423518 | 5.589815 | 0.000847 | 0.099574 | -0.07766 |
| LOC421179    | A_87_P026850 | 2.200907 | 8.179382 | 5.798062 | 0.000684 | 0.097029 | 0.124379 |
| CO771160     | A_87_P019220 | 2.198366 | 6.566678 | 5.552347 | 0.000881 | 0.099916 | -0.11365 |
| LOC395210    | A_87_P017952 | 2.193343 | 7.102583 | 7.172012 | 0.000189 | 0.078409 | 1.352446 |
| RCJMB04_21j5 | A_87_P012102 | 2.183237 | 10.45699 | 14.63524 | 1.78E-06 | 0.007192 | 4.797705 |
| TC203225     | A_87_P005875 | 2.17043  | 14.69902 | 10.74599 | 1.4E-05  | 0.026857 | 3.4435   |
| HCRT         | A_87_P014389 | 2.155708 | 8.788928 | 8.399576 | 6.96E-05 | 0.067942 | 2.199138 |
| LFNG         | A_87_P008992 | 2.12722  | 7.951289 | 8.080736 | 8.91E-05 | 0.067942 | 1.970016 |
| TC210304     | A_87_P003832 | 2.119006 | 9.830926 | 9.759057 | 2.64E-05 | 0.044472 | 2.964463 |
| ABHD6        | A_87_P026925 | 2.10777  | 6.361032 | 6.634556 | 0.000305 | 0.085477 | 0.882713 |
| AJ455964     | A_87_P037269 | 2.080655 | 7.851321 | 5.977741 | 0.000571 | 0.091014 | 0.297599 |
| AJ728686     | A_87_P035890 | 2.069296 | 6.565869 | 5.949401 | 0.000587 | 0.092215 | 0.27224  |
| CR386260     | A_87_P016602 | 2.068276 | 8.196046 | 8.483269 | 6.54E-05 | 0.067942 | 2.404434 |
| CO770158     | A_87_P019319 | 2.054021 | 6.291328 | 6.020185 | 0.000547 | 0.090346 | 0.335759 |
| PHOX2        | A_87_P008691 | 2.052143 | 7.076713 | 6.24684  | 0.000439 | 0.086348 | 0.547996 |
| CV858659     | A_87_P010532 | 2.04848  | 7.476356 | 6.835216 | 0.000254 | 0.083063 | 1.060871 |
| TC207295     | A_87_P004132 | 2.019629 | 6.849754 | 6.208783 | 0.000455 | 0.087483 | 0.508601 |
| TC206022     | A_87_P004642 | 1.996117 | 7.048458 | 6.622625 | 0.000308 | 0.085477 | 0.878216 |
| TC202794     | A_87_P006118 | 1.993664 | 7.037863 | 5.90432  | 0.000614 | 0.095047 | 0.243364 |
| TNNT3        | A_87_P034373 | 1.982154 | 7.181178 | 6.465095 | 0.000357 | 0.086348 | 0.741877 |
| CR390868     | A_87_P013879 | 1.972242 | 6.670342 | 5.740135 | 0.000725 | 0.097039 | 0.07057  |
| LOC423162    | A_87_P023103 | 1.959043 | 7.492054 | 9.564628 | 3.01E-05 | 0.045273 | 2.861598 |

|           |              |          |          |          |          |          |          |
|-----------|--------------|----------|----------|----------|----------|----------|----------|
| TC221798  | A_87_P002470 | 1.956084 | 7.539481 | 6.10745  | 0.000502 | 0.089473 | 0.421928 |
| BU470394  | A_87_P025748 | 1.949767 | 7.051337 | 6.074588 | 0.000519 | 0.089473 | 0.386078 |
| TNPO3     | A_87_P016263 | 1.936908 | 7.527136 | 8.916763 | 4.74E-05 | 0.05874  | 2.532564 |
| TC203827  | A_87_P005544 | 1.931267 | 6.785104 | 8.036471 | 9.23E-05 | 0.067942 | 1.968875 |
| ARC       | A_87_P037475 | 1.9235   | 7.985849 | 6.902054 | 0.000239 | 0.082384 | 1.10266  |
| LOC420585 | A_87_P028929 | 1.919875 | 7.739128 | 5.793343 | 0.000687 | 0.097029 | 0.124352 |
| MDK       | A_87_P009319 | 1.909597 | 6.518566 | 5.283509 | 0.001172 | 0.109872 | -0.11663 |
| CN237892  | A_87_P040742 | 1.905446 | 7.728358 | 8.24514  | 7.84E-05 | 0.067942 | 2.11723  |
| LOC423636 | A_87_P030019 | 1.90392  | 6.904272 | 6.508516 | 0.000342 | 0.086348 | 0.802589 |
| BX262701  | A_87_P025099 | 1.889939 | 7.666799 | 6.929627 | 0.000233 | 0.082384 | 1.126286 |
| ZDHHC5    | A_87_P035034 | 1.889719 | 6.815334 | 6.076138 | 0.000518 | 0.089473 | 0.392712 |
| TC223018  | A_87_P002214 | 1.871087 | 9.922726 | 7.479067 | 0.000145 | 0.075518 | 1.56846  |
| CR385621  | A_87_P017031 | 1.869029 | 6.845923 | 5.974786 | 0.000572 | 0.091014 | 0.294774 |
| BU268923  | A_87_P031191 | 1.865009 | 6.810877 | 6.698134 | 0.000287 | 0.085477 | 0.932006 |
| CR390688  | A_87_P013990 | 1.854372 | 8.913598 | 10.90366 | 1.27E-05 | 0.026691 | 3.513855 |
| AKT2      | A_87_P037817 | 1.847453 | 7.446635 | 10.86802 | 1.3E-05  | 0.026691 | 3.498093 |
| BU373614  | A_87_P028711 | 1.846066 | 8.163094 | 6.698686 | 0.000287 | 0.085477 | 0.976232 |
| TC224651  | A_87_P001292 | 1.841672 | 7.535536 | 5.645683 | 0.000799 | 0.098651 | -0.01443 |
| BU414476  | A_87_P027750 | 1.840702 | 6.296522 | 5.816072 | 0.000671 | 0.097029 | 0.146895 |
| CD760819  | A_87_P021203 | 1.832628 | 6.716274 | 5.93641  | 0.000595 | 0.092766 | 0.268213 |
| CDON      | A_87_P015827 | 1.830065 | 6.648162 | 6.218217 | 0.000451 | 0.087483 | 0.522514 |
| BU305794  | A_87_P030191 | 1.822992 | 7.504305 | 7.977461 | 9.67E-05 | 0.067942 | 1.922181 |
| TC227335  | A_87_P000158 | 1.822138 | 6.88685  | 7.434658 | 0.000151 | 0.075518 | 1.512266 |
| TC227424  | A_87_P000116 | 1.802957 | 7.217393 | 6.751903 | 0.000274 | 0.085477 | 0.980897 |
| GBE       | A_87_P035833 | 1.800988 | 7.483263 | 6.295295 | 0.000419 | 0.086348 | 0.58707  |
| CR390166  | A_87_P014333 | 1.793541 | 8.688592 | 6.832037 | 0.000255 | 0.083063 | 1.043298 |
| IRS-1     | A_87_P009216 | 1.780841 | 6.759091 | 6.194661 | 0.000461 | 0.088112 | 0.506938 |

|           |              |          |          |          |          |          |          |
|-----------|--------------|----------|----------|----------|----------|----------|----------|
| APOB      | A_87_P034149 | 1.769869 | 8.584946 | 5.712907 | 0.000746 | 0.097039 | 0.041942 |
| CSPG5     | A_87_P008748 | 1.769304 | 6.166809 | 7.302733 | 0.000169 | 0.076686 | 1.426966 |
| TC224509  | A_87_P001374 | 1.75378  | 6.756692 | 5.891841 | 0.000622 | 0.095892 | 0.225718 |
| BU452711  | A_87_P026454 | 1.72602  | 6.30809  | 5.734334 | 0.00073  | 0.097039 | 0.06639  |
| LOC425139 | A_87_P014925 | 1.706878 | 9.1819   | 7.088894 | 0.000203 | 0.079009 | 1.250895 |
| HBD       | A_87_P009554 | 1.705073 | 12.83512 | 9.162324 | 3.98E-05 | 0.052362 | 2.639034 |
| BU415119  | A_87_P027742 | 1.69864  | 6.82061  | 5.814261 | 0.000673 | 0.097029 | 0.141652 |
| TC219891  | A_87_P002751 | 1.696874 | 6.877864 | 7.807604 | 0.000111 | 0.071748 | 1.814234 |
| CD727362  | A_87_P021327 | 1.6915   | 6.531663 | 5.605648 | 0.000833 | 0.099014 | -0.05602 |
| BX260117  | A_87_P025154 | 1.656703 | 7.028143 | 6.906544 | 0.000238 | 0.082384 | 1.108304 |
| CO768011  | A_87_P019527 | 1.650364 | 6.596461 | 6.596703 | 0.000315 | 0.085477 | 0.848109 |
| TC226737  | A_87_P000466 | 1.636989 | 7.763476 | 6.388054 | 0.000383 | 0.086348 | 0.667342 |
| GLT25D2   | A_87_P017120 | 1.618886 | 7.149251 | 5.719695 | 0.000741 | 0.097039 | 0.05089  |
| CO757296  | A_87_P020145 | 1.609191 | 6.223491 | 6.146565 | 0.000483 | 0.089473 | 0.45541  |
| VAX1      | A_87_P038172 | 1.608225 | 6.249451 | 6.246269 | 0.000439 | 0.086348 | 0.54115  |
| BU424987  | A_87_P041883 | 1.604188 | 6.308624 | 6.090902 | 0.00051  | 0.089473 | 0.40256  |
| OLIG3     | A_87_P037632 | 1.592316 | 6.704635 | 6.481658 | 0.000351 | 0.086348 | 0.755415 |
| TC220349  | A_87_P002688 | 1.587422 | 7.059313 | 5.712963 | 0.000746 | 0.097039 | 0.043555 |
| CR406193  | A_87_P012941 | 1.583236 | 9.072681 | 8.011658 | 9.41E-05 | 0.067942 | 1.939011 |
| AJ739127  | A_87_P035851 | 1.581738 | 7.439919 | 6.100811 | 0.000506 | 0.089473 | 0.414837 |
| BU387573  | A_87_P028278 | 1.566462 | 7.037257 | 5.574577 | 0.00086  | 0.099586 | -0.09321 |
| DYNC1H1   | A_87_P008241 | 1.559896 | 10.70518 | 8.978146 | 4.54E-05 | 0.057899 | 2.532564 |
| MGAT5     | A_87_P016016 | 1.558693 | 8.754848 | 6.618124 | 0.000309 | 0.085477 | 0.868148 |
| LOC425289 | A_87_P012241 | 1.548216 | 7.239367 | 5.800808 | 0.000682 | 0.097029 | 0.127784 |
| WHSC1L1   | A_87_P013214 | 1.543161 | 9.44192  | 5.678486 | 0.000773 | 0.097658 | 0.010406 |
| DYNC1H1   | A_87_P038038 | 1.524044 | 7.552734 | 6.495052 | 0.000347 | 0.086348 | 0.759306 |
| DN829968  | A_87_P009752 | 1.521387 | 6.157345 | 5.722149 | 0.000739 | 0.097039 | 0.05578  |

|              |              |          |          |          |          |          |          |
|--------------|--------------|----------|----------|----------|----------|----------|----------|
| BU120493     | A_87_P034283 | 1.519967 | 6.804688 | 5.727174 | 0.000735 | 0.097039 | 0.06274  |
| CR390671     | A_87_P014002 | 1.519435 | 7.690412 | 7.435064 | 0.000151 | 0.075518 | 1.512744 |
| RCJMB04_20d5 | A_87_P036326 | 1.511338 | 7.193692 | 6.125401 | 0.000494 | 0.089473 | 0.432518 |
| KIF5B        | A_87_P022772 | 1.510213 | 10.54807 | 6.370116 | 0.00039  | 0.086348 | 0.655305 |
| LOC427758    | A_87_P007751 | 1.504371 | 7.146365 | 5.555331 | 0.000878 | 0.099874 | -0.11246 |
| BU205361     | A_87_P033349 | 1.500232 | 5.990556 | 7.321331 | 0.000166 | 0.076686 | 1.435026 |
| BU455240     | A_87_P026343 | 1.498661 | 7.580348 | 5.63297  | 0.00081  | 0.098798 | -0.03621 |
| CV859110     | A_87_P010492 | 1.498212 | 8.213298 | 5.982636 | 0.000568 | 0.091014 | 0.30201  |
| LOC427434    | A_87_P022431 | 1.493964 | 8.637726 | 6.506442 | 0.000343 | 0.086348 | 0.770897 |
| TC186792     | A_87_P008265 | 1.47477  | 8.0653   | 6.45958  | 0.000358 | 0.086348 | 0.733428 |
| AM067107     | A_87_P035373 | 1.470295 | 6.862038 | 6.861555 | 0.000248 | 0.083063 | 1.099032 |
| CRYBA1       | A_87_P009400 | 1.461856 | 7.182145 | 5.690526 | 0.000763 | 0.097039 | 0.021683 |
| LOC426613    | A_87_P023334 | 1.461766 | 7.334105 | 6.380346 | 0.000386 | 0.086348 | 0.661881 |
| BU295088     | A_87_P030477 | 1.458997 | 6.369213 | 5.591441 | 0.000845 | 0.099574 | -0.06943 |
| RCJMB04_19e2 | A_87_P035599 | 1.436466 | 11.19889 | 6.270822 | 0.000429 | 0.086348 | 0.563277 |
| BU460481     | A_87_P026133 | 1.432495 | 7.71433  | 7.359445 | 0.000161 | 0.076686 | 1.511964 |
| TC226823     | A_87_P000414 | 1.424276 | 7.131516 | 6.855012 | 0.000249 | 0.083063 | 1.066196 |
| NKX-2.2      | A_87_P037886 | 1.420833 | 7.488328 | 5.719655 | 0.000741 | 0.097039 | 0.048501 |
| LOC419750    | A_87_P015390 | 1.420091 | 6.147698 | 6.087101 | 0.000512 | 0.089473 | 0.399655 |
| BU417989     | A_87_P027684 | 1.417371 | 6.413987 | 5.603326 | 0.000835 | 0.099014 | -0.06356 |
| GRB2         | A_87_P009495 | 1.413722 | 9.467102 | 6.383001 | 0.000385 | 0.086348 | 0.663941 |
| CR385664     | A_87_P017003 | 1.405559 | 6.755644 | 5.95369  | 0.000585 | 0.092166 | 0.284928 |
| CN234081     | A_87_P020521 | 1.40503  | 6.349822 | 6.935865 | 0.000232 | 0.082384 | 1.157745 |
| TC205715     | A_87_P004815 | 1.404161 | 6.062793 | 6.921597 | 0.000235 | 0.082384 | 1.121268 |
| LOC419436    | A_87_P002536 | 1.39013  | 6.364257 | 5.613263 | 0.000826 | 0.098833 | -0.05107 |
| PLEKHQ1      | A_87_P012444 | 1.389024 | 7.2908   | 6.255961 | 0.000435 | 0.086348 | 0.562603 |
| LOC418607    | A_87_P017318 | 1.387334 | 8.679819 | 7.854736 | 0.000107 | 0.070151 | 1.846759 |

|               |              |          |          |          |          |          |          |
|---------------|--------------|----------|----------|----------|----------|----------|----------|
| ELMOD2        | A_87_P023542 | 1.38582  | 8.189453 | 6.006753 | 0.000555 | 0.090837 | 0.330603 |
| RCJMB04_11I17 | A_87_P036602 | 1.385593 | 11.47125 | 6.603716 | 0.000313 | 0.085477 | 0.857146 |
| U76305        | A_87_P009023 | 1.383621 | 8.199186 | 6.115195 | 0.000498 | 0.089473 | 0.421949 |
| CV862615      | A_87_P009876 | 1.378644 | 8.374657 | 5.845068 | 0.000652 | 0.097029 | 0.172922 |
| BU446674      | A_87_P026707 | 1.366628 | 6.019076 | 5.6333   | 0.000809 | 0.098798 | -0.024   |
| BX277609      | A_87_P024840 | 1.366506 | 8.908586 | 6.151891 | 0.000481 | 0.089473 | 0.471135 |
| SPEN          | A_87_P007302 | 1.361437 | 7.678228 | 5.973887 | 0.000573 | 0.091014 | 0.29201  |
| CR353864      | A_87_P017683 | 1.355605 | 7.090907 | 6.980925 | 0.000223 | 0.082384 | 1.20212  |
| BU462788      | A_87_P026028 | 1.344111 | 7.376784 | 7.954668 | 9.85E-05 | 0.067942 | 1.886775 |
| CR391365      | A_87_P013511 | 1.342527 | 7.535799 | 5.873778 | 0.000633 | 0.097029 | 0.213901 |
| CR523642      | A_87_P011476 | 1.341913 | 6.81085  | 5.560209 | 0.000873 | 0.099874 | -0.10389 |
| NHSL1         | A_87_P002050 | 1.340994 | 6.553987 | 7.511111 | 0.000141 | 0.075518 | 1.581157 |
| BX931974      | A_87_P023710 | 1.336622 | 7.308088 | 5.699416 | 0.000756 | 0.097039 | 0.033583 |
| BU421848      | A_87_P027483 | 1.332581 | 6.488086 | 6.073442 | 0.000519 | 0.089473 | 0.384651 |
| RCJMB04_22k13 | A_87_P009183 | 1.33121  | 7.357983 | 5.742397 | 0.000724 | 0.097039 | 0.074667 |
| LOC416214     | A_87_P015049 | 1.314499 | 6.999075 | 6.494602 | 0.000347 | 0.086348 | 0.759306 |
| AADAC         | A_87_P034264 | 1.303529 | 6.686007 | 5.802494 | 0.000681 | 0.097029 | 0.132983 |
| BX934358      | A_87_P022627 | 1.303268 | 6.75994  | 7.290145 | 0.00017  | 0.076686 | 1.412873 |
| CR388868      | A_87_P015174 | 1.302289 | 7.894729 | 5.565099 | 0.000869 | 0.099822 | -0.09859 |
| BU391107      | A_87_P028183 | 1.282306 | 6.958768 | 6.021721 | 0.000546 | 0.090346 | 0.34094  |
| TC207604      | A_87_P004074 | 1.279857 | 7.306998 | 7.231129 | 0.000179 | 0.076686 | 1.363166 |
| TC193639      | A_87_P007630 | 1.271465 | 7.109907 | 6.233973 | 0.000444 | 0.08697  | 0.540638 |
| CR353938      | A_87_P017639 | 1.267241 | 9.818816 | 8.853669 | 4.97E-05 | 0.059734 | 2.496416 |
| BU228800      | A_87_P032464 | 1.259823 | 5.97449  | 5.772018 | 0.000702 | 0.097039 | 0.10584  |
| CASZ1         | A_87_P023401 | 1.257562 | 6.413517 | 5.738091 | 0.000727 | 0.097039 | 0.068081 |
| CR338795      | A_87_P018837 | 1.23002  | 8.141499 | 6.545476 | 0.000331 | 0.086348 | 0.808141 |
| LOC415553     | A_87_P021890 | 1.228892 | 8.779147 | 7.930837 | 0.0001   | 0.068129 | 1.88328  |

|              |              |          |          |          |          |          |          |
|--------------|--------------|----------|----------|----------|----------|----------|----------|
| CR523450     | A_87_P011601 | 1.228428 | 7.711953 | 6.117745 | 0.000497 | 0.089473 | 0.43126  |
| LARP1        | A_87_P015360 | 1.221218 | 7.451497 | 5.855621 | 0.000645 | 0.097029 | 0.1905   |
| HS1BP3       | A_87_P018137 | 1.20385  | 7.953201 | 5.808004 | 0.000677 | 0.097029 | 0.139915 |
| TC225719     | A_87_P000887 | 1.199451 | 7.156528 | 6.1824   | 0.000467 | 0.088136 | 0.487547 |
| CTCF         | A_87_P008703 | 1.189698 | 9.822619 | 7.632652 | 0.000128 | 0.075518 | 1.713043 |
| LOC425243    | A_87_P021357 | 1.188633 | 7.480518 | 6.288759 | 0.000421 | 0.086348 | 0.583198 |
| BU332246     | A_87_P029583 | 1.184938 | 6.096583 | 7.163319 | 0.00019  | 0.078409 | 1.312645 |
| ANKRD11      | A_87_P028441 | 1.165922 | 10.30644 | 8.171477 | 8.3E-05  | 0.067942 | 2.078024 |
| LOC419672    | A_87_P027565 | 1.155371 | 6.314449 | 6.474859 | 0.000353 | 0.086348 | 0.747751 |
| CR386677     | A_87_P016317 | 1.154625 | 6.429055 | 5.82363  | 0.000666 | 0.097029 | 0.15858  |
| BX935775     | A_87_P021947 | 1.143107 | 9.059871 | 7.1004   | 0.000201 | 0.079009 | 1.261103 |
| LOC419037    | A_87_P015156 | 1.142997 | 12.52331 | 7.435708 | 0.000151 | 0.075518 | 1.540566 |
| RCJMB04_7d18 | A_87_P036813 | 1.135897 | 9.673969 | 7.223731 | 0.00018  | 0.076686 | 1.358227 |
| MYOG         | A_87_P009757 | 1.134265 | 5.906094 | 5.980762 | 0.000569 | 0.091014 | 0.29935  |
| TC222502     | A_87_P002382 | 1.128253 | 8.892461 | 5.798949 | 0.000683 | 0.097029 | 0.126992 |
| BU461582     | A_87_P026084 | 1.12468  | 9.215992 | 8.432569 | 6.79E-05 | 0.067942 | 2.231306 |
| BX930578     | A_87_P024243 | 1.123381 | 10.19514 | 7.572954 | 0.000134 | 0.075518 | 1.646038 |
| TEAD3        | A_87_P009075 | 1.118697 | 7.782432 | 6.36501  | 0.000392 | 0.086348 | 0.650567 |
| LOC417506    | A_87_P017838 | 1.117494 | 6.06158  | 7.331991 | 0.000164 | 0.076686 | 1.455721 |
| UBXD2        | A_87_P022336 | 1.117154 | 9.896447 | 8.305223 | 7.48E-05 | 0.067942 | 2.178071 |
| BU476696     | A_87_P025525 | 1.115695 | 6.479473 | 5.755239 | 0.000714 | 0.097039 | 0.083658 |
| LOC430010    | A_87_P021512 | 1.11306  | 8.707549 | 5.801631 | 0.000681 | 0.097029 | 0.128613 |
| BRD1         | A_87_P034947 | 1.103087 | 9.767223 | 6.350307 | 0.000397 | 0.086348 | 0.646078 |
| CDC42BPB     | A_87_P032380 | 1.099127 | 9.222297 | 7.237568 | 0.000178 | 0.076686 | 1.386868 |
| APOB         | A_87_P012184 | 1.09547  | 9.614417 | 3.977466 | 0.005425 | 0.16791  | -0.66244 |
| LOC396450    | A_87_P009378 | 1.088027 | 6.499232 | 6.584522 | 0.000319 | 0.085477 | 0.842836 |
| BM426314     | A_87_P034888 | 1.087344 | 6.203328 | 5.838829 | 0.000656 | 0.097029 | 0.169403 |

|              |              |          |          |          |          |          |          |
|--------------|--------------|----------|----------|----------|----------|----------|----------|
| GBX-1        | A_87_P038146 | 1.084931 | 6.663906 | 5.675369 | 0.000775 | 0.097679 | 0.008239 |
| LOC424135    | A_87_P030843 | 1.079261 | 8.621746 | 6.412634 | 0.000375 | 0.086348 | 0.708848 |
| CD217788     | A_87_P021367 | 1.077373 | 6.524163 | 6.169198 | 0.000473 | 0.088874 | 0.483101 |
| CR353205     | A_87_P018094 | 1.071299 | 7.355828 | 6.453976 | 0.00036  | 0.086348 | 0.728651 |
| BU305923     | A_87_P030186 | 1.069782 | 8.261443 | 6.187313 | 0.000465 | 0.088112 | 0.489003 |
| UPP2         | A_87_P022639 | 1.051648 | 6.786706 | 5.583277 | 0.000853 | 0.099586 | -0.07928 |
| TC194424     | A_87_P007536 | 1.046128 | 8.169236 | 5.618258 | 0.000822 | 0.098833 | -0.04935 |
| LOC415476    | A_87_P034974 | 1.034263 | 8.097802 | 5.575813 | 0.000859 | 0.099586 | -0.08901 |
| LOC419752    | A_87_P008020 | 1.03038  | 8.024437 | 2.692739 | 0.031187 | 0.297013 | -3.59001 |
| ADIPOR2      | A_87_P037108 | 1.030011 | 11.08546 | 6.29393  | 0.000419 | 0.086348 | 0.584028 |
| BU467197     | A_87_P025869 | 1.029769 | 7.158828 | 6.094065 | 0.000509 | 0.089473 | 0.404187 |
| RCJMB04_30e3 | A_87_P011423 | 1.025104 | 11.81114 | 7.711025 | 0.00012  | 0.075518 | 1.781296 |
| BU397032     | A_87_P040788 | 1.018715 | 6.597443 | 7.541407 | 0.000138 | 0.075518 | 1.594714 |
| CR386490     | A_87_P016444 | 1.015271 | 8.093747 | 5.852261 | 0.000647 | 0.097029 | 0.178495 |
| CR389707     | A_87_P014643 | 1.013316 | 7.115202 | 5.621275 | 0.00082  | 0.098833 | -0.04269 |
| BU425544     | A_87_P027321 | 1.011832 | 7.753464 | 6.053381 | 0.00053  | 0.089898 | 0.373329 |
| RRAS2        | A_87_P014781 | 1.008904 | 10.9093  | 6.027303 | 0.000543 | 0.090346 | 0.34688  |
| LOC418850    | A_87_P010987 | 1.000907 | 10.18271 | 7.52842  | 0.000139 | 0.075518 | 1.590661 |
| BX260970     | A_87_P025138 | 0.99912  | 11.04211 | 6.596331 | 0.000316 | 0.085477 | 0.84621  |
| LOC417598    | A_87_P007248 | 0.998994 | 9.635278 | 6.757542 | 0.000272 | 0.085477 | 1.008879 |
| LOC395818    | A_87_P009087 | 0.995454 | 7.258798 | 6.791475 | 0.000264 | 0.084199 | 1.023939 |
| LMO4         | A_87_P037569 | 0.983679 | 8.768973 | 6.254483 | 0.000436 | 0.086348 | 0.549319 |
| LOC416235    | A_87_P018176 | 0.974674 | 8.182308 | 6.378465 | 0.000387 | 0.086348 | 0.659552 |
| CR389142     | A_87_P015005 | 0.97023  | 7.051845 | 6.639892 | 0.000303 | 0.085477 | 0.883782 |
| LOC420679    | A_87_P022679 | 0.964185 | 7.253527 | 5.696453 | 0.000758 | 0.097039 | 0.02872  |
| LOC416529    | A_87_P016175 | 0.960936 | 7.016567 | 6.305188 | 0.000415 | 0.086348 | 0.600197 |
| BU377193     | A_87_P041674 | 0.958737 | 7.32051  | 6.375508 | 0.000388 | 0.086348 | 0.657901 |

|           |              |          |          |          |          |          |          |
|-----------|--------------|----------|----------|----------|----------|----------|----------|
| BG713524  | A_87_P041329 | 0.957433 | 8.800377 | 5.692216 | 0.000762 | 0.097039 | 0.025825 |
| MEF2A     | A_87_P037524 | 0.952317 | 9.247953 | 6.390147 | 0.000383 | 0.086348 | 0.675832 |
| CR390595  | A_87_P014045 | 0.934185 | 12.75921 | 5.834543 | 0.000659 | 0.097029 | 0.163443 |
| ABCD2     | A_87_P012773 | 0.931848 | 9.228287 | 5.750899 | 0.000717 | 0.097039 | 0.08302  |
| BU229541  | A_87_P032429 | 0.929412 | 9.5082   | 6.680118 | 0.000292 | 0.085477 | 0.931546 |
| LOC427047 | A_87_P011568 | 0.922807 | 8.414633 | 5.704396 | 0.000752 | 0.097039 | 0.041041 |
| CO635711  | A_87_P020191 | 0.917505 | 6.975835 | 6.319283 | 0.000409 | 0.086348 | 0.608475 |
| CR390958  | A_87_P013821 | 0.900795 | 12.35613 | 5.626734 | 0.000815 | 0.098833 | -0.03653 |
| LOC419752 | A_87_P025507 | 0.892069 | 8.934367 | 5.778847 | 0.000697 | 0.097039 | 0.11981  |
| LGR5      | A_87_P018440 | 0.891834 | 6.029103 | 6.389229 | 0.000383 | 0.086348 | 0.668146 |
| CD733169  | A_87_P021265 | 0.888991 | 6.585147 | 6.493181 | 0.000347 | 0.086348 | 0.758919 |
| CR522893  | A_87_P011989 | 0.886915 | 8.455516 | 5.570415 | 0.000864 | 0.09966  | -0.09526 |
| LHX1      | A_87_P009469 | 0.878048 | 5.904062 | 5.807041 | 0.000677 | 0.097029 | 0.133909 |
| LOC422838 | A_87_P005240 | 0.877494 | 8.925267 | 6.316594 | 0.00041  | 0.086348 | 0.605707 |
| MARK1     | A_87_P021538 | 0.873065 | 9.128538 | 6.115218 | 0.000498 | 0.089473 | 0.424261 |
| LOC420214 | A_87_P023888 | 0.867584 | 9.555262 | 6.188922 | 0.000464 | 0.088112 | 0.494191 |
| CR352797  | A_87_P018359 | 0.863893 | 6.479242 | 5.714619 | 0.000744 | 0.097039 | 0.048462 |
| BU439010  | A_87_P041884 | 0.858269 | 6.582341 | 5.680697 | 0.000771 | 0.097658 | 0.020029 |
| CR523552  | A_87_P011535 | 0.840863 | 6.772858 | 5.62068  | 0.00082  | 0.098833 | -0.04809 |
| CR352651  | A_87_P018456 | 0.833935 | 9.313825 | 5.82154  | 0.000668 | 0.097029 | 0.148898 |
| TC223629  | A_87_P001871 | 0.830793 | 6.396773 | 5.620004 | 0.000821 | 0.098833 | -0.04868 |
| WDR67     | A_87_P015733 | 0.827721 | 7.068219 | 5.854597 | 0.000646 | 0.097029 | 0.179471 |
| LOC430267 | A_87_P021385 | 0.825773 | 6.102752 | 5.599738 | 0.000838 | 0.099105 | -0.06587 |
| BU223011  | A_87_P032666 | 0.823434 | 6.517572 | 5.74662  | 0.00072  | 0.097039 | 0.075929 |
| CR385965  | A_87_P016795 | 0.81376  | 5.89569  | 6.000716 | 0.000558 | 0.091014 | 0.321842 |
| RPLP2     | A_87_P021942 | 0.812594 | 11.79978 | 5.985484 | 0.000566 | 0.091014 | 0.31622  |
| CR352647  | A_87_P018460 | 0.798797 | 8.590207 | 6.083348 | 0.000514 | 0.089473 | 0.396163 |

|           |              |          |          |          |          |          |          |
|-----------|--------------|----------|----------|----------|----------|----------|----------|
| SLC24A2   | A_87_P037824 | 0.781334 | 8.896764 | 5.670081 | 0.000779 | 0.09792  | 0.005183 |
| ANKRD11   | A_87_P016287 | 0.766597 | 10.29186 | 3.132386 | 0.016719 | 0.243609 | -3.01018 |
| TC188062  | A_87_P008155 | 0.744613 | 6.77842  | 5.747922 | 0.000719 | 0.097039 | 0.078815 |
| CR406691  | A_87_P012600 | 0.743718 | 10.16275 | 5.739832 | 0.000725 | 0.097039 | 0.068375 |
| NHSL1     | A_87_P000961 | 0.737955 | 6.169901 | 3.783682 | 0.006958 | 0.181344 | -1.89426 |
| CUBN      | A_87_P015770 | 0.734722 | 11.1799  | 5.55652  | 0.000877 | 0.099874 | -0.10877 |
| ABHD6     | A_87_P013037 | 0.445399 | 13.33248 | 2.091813 | 0.075075 | 0.403165 | -4.19736 |
| APOB      | A_87_P009392 | 0.424524 | 15.69096 | 1.864071 | 0.104909 | 0.455966 | -4.54514 |
| AADAC     | A_87_P023433 | 0.416105 | 5.847187 | 2.60086  | 0.035619 | 0.310686 | -3.63041 |
| FZR1      | A_87_P037627 | 0.394851 | 6.220306 | 2.293508 | 0.055801 | 0.361748 | -4.15128 |
| LOC418850 | A_87_P003958 | 0.344575 | 7.096828 | 2.046067 | 0.080303 | 0.413044 | -4.50375 |
| LOC419671 | A_87_P011480 | 0.315535 | 5.884477 | 1.711894 | 0.130979 | 0.496481 | -4.92827 |
| UPP2      | A_87_P012718 | 0.309693 | 8.058923 | 1.79142  | 0.116664 | 0.474499 | -4.79558 |
| NHSL1     | A_87_P023191 | 0.282104 | 6.55258  | 2.075769 | 0.076869 | 0.406701 | -4.48135 |
| PLEKHQ1   | A_87_P027367 | 0.257251 | 5.346288 | 1.781834 | 0.118306 | 0.477101 | -4.89365 |
| BRD1      | A_87_P031217 | 0.242178 | 5.796926 | 1.765536 | 0.12115  | 0.481149 | -4.90649 |
| LOC416214 | A_87_P033333 | 0.203628 | 5.78895  | 1.510325 | 0.175034 | 0.557327 | -5.13602 |
| LOC422838 | A_87_P026888 | 0.194569 | 6.023572 | 1.32277  | 0.227793 | 0.615731 | -5.25868 |
| AADAC     | A_87_P024018 | 0.189028 | 7.966028 | 0.515435 | 0.622242 | 0.88549  | -6.16412 |
| SPEN      | A_87_P007724 | 0.177515 | 6.01671  | 1.224774 | 0.260565 | 0.64893  | -5.48528 |
| CPA2      | A_87_P019171 | 0.167855 | 5.384217 | 0.963547 | 0.367608 | 0.74067  | -5.8485  |
| ANKRD11   | A_87_P041632 | 0.111169 | 5.987283 | 0.398662 | 0.702112 | 0.916227 | -6.26063 |
| SPEN      | A_87_P033540 | 0.08863  | 5.609021 | 0.592812 | 0.572092 | 0.861868 | -6.02776 |
| CUBN      | A_87_P006481 | 0.073723 | 5.561673 | 0.399001 | 0.701873 | 0.916227 | -6.23531 |
| LARP1     | A_87_P014677 | 0.070828 | 6.327151 | 0.453968 | 0.663695 | 0.902982 | -6.20337 |
| SPEN      | A_87_P015114 | 0.058758 | 5.995002 | 0.357638 | 0.731233 | 0.926262 | -6.26078 |
| CRYBA1    | A_87_P019019 | 0.049637 | 5.441549 | 0.290538 | 0.779887 | 0.94178  | -6.29888 |

|      |              |          |          |          |          |          |          |
|------|--------------|----------|----------|----------|----------|----------|----------|
| BRD1 | A_87_P018384 | 0.045186 | 7.330342 | 0.249728 | 0.810021 | 0.952432 | -6.30139 |
| SPEN | A_87_P005488 | 0.03828  | 5.398131 | 0.209138 | 0.840341 | 0.961019 | -6.31349 |
| CDON | A_87_P020225 | 0.025987 | 6.587412 | 0.138237 | 0.893975 | 0.972653 | -6.32374 |

## Anethol

### Down regulated genes

|           |              |          |          |          |          |          |          |
|-----------|--------------|----------|----------|----------|----------|----------|----------|
| LARP1     | A_87_P034758 | -0.00358 | 5.313377 | -0.02521 | 0.980597 | 0.994518 | -6.33734 |
| ANKRD11   | A_87_P038543 | -0.05038 | 5.858476 | -0.30765 | 0.767364 | 0.93754  | -6.27763 |
| LOC421179 | A_87_P038022 | -0.0603  | 5.467891 | -0.29833 | 0.774175 | 0.939923 | -6.29578 |
| DYNC1H1   | A_87_P008121 | -0.08909 | 5.870267 | -0.58274 | 0.578482 | 0.86411  | -6.16412 |
| GRB2      | A_87_P029728 | -0.11515 | 5.315705 | -0.77623 | 0.463217 | 0.80583  | -5.86542 |
| TNNT3     | A_87_P009388 | -0.13219 | 5.292242 | -0.98143 | 0.359318 | 0.73363  | -5.59675 |
| GLT25D2   | A_87_P027152 | -0.30383 | 5.81651  | -1.60707 | 0.152403 | 0.527947 | -4.99945 |
| BU308605  | A_87_P030118 | -0.34726 | 9.532341 | -2.38732 | 0.048627 | 0.343887 | -3.98925 |
| LOC419037 | A_87_P017184 | -0.35478 | 10.36378 | -2.32603 | 0.053199 | 0.356699 | -4.06431 |
| LOC420585 | A_87_P024094 | -0.39163 | 5.403571 | -2.72125 | 0.029932 | 0.293397 | -3.4993  |
| LOC418850 | A_87_P010115 | -0.4078  | 6.268512 | -2.94052 | 0.021887 | 0.264463 | -3.02095 |
| DYNC1H1   | A_87_P019789 | -0.41912 | 10.70052 | -2.44015 | 0.04501  | 0.335573 | -3.98925 |
| CDC42BPB  | A_87_P018639 | -0.45147 | 6.698886 | -2.78538 | 0.027299 | 0.283947 | -3.28098 |
| LOC418607 | A_87_P033600 | -0.51507 | 9.179022 | -3.12728 | 0.016839 | 0.244288 | -3.0139  |
| KIF5B     | A_87_P007853 | -0.57485 | 6.491169 | -3.13508 | 0.016657 | 0.243538 | -2.14155 |
| BU273071  | A_87_P031048 | -0.8169  | 7.72065  | -5.84875 | 0.000649 | 0.097029 | 0.176267 |
| MORF4L1   | A_87_P016244 | -0.8651  | 10.55829 | -6.38535 | 0.000384 | 0.086348 | 0.666313 |
| TC208562  | A_87_P003961 | -0.86766 | 8.650317 | -6.04579 | 0.000534 | 0.090209 | 0.365087 |
| LOC425610 | A_87_P024269 | -0.88469 | 10.08882 | -6.59273 | 0.000317 | 0.085477 | 0.845894 |
| CO764135  | A_87_P019795 | -0.88498 | 8.928574 | -5.83374 | 0.000659 | 0.097029 | 0.159344 |
| CR732995  | A_87_P010849 | -0.8861  | 7.634547 | -6.03911 | 0.000537 | 0.090346 | 0.358069 |

|             |              |          |          |          |          |          |          |
|-------------|--------------|----------|----------|----------|----------|----------|----------|
| LOC415445   | A_87_P019604 | -0.89443 | 10.07785 | -6.03371 | 0.00054  | 0.090346 | 0.351884 |
| GNPDA1      | A_87_P036824 | -0.9231  | 9.819387 | -6.33255 | 0.000404 | 0.086348 | 0.633128 |
| LOC427054   | A_87_P036130 | -0.93781 | 9.837849 | -6.43677 | 0.000366 | 0.086348 | 0.723792 |
| UGP2        | A_87_P036732 | -0.94837 | 11.4386  | -5.96722 | 0.000577 | 0.091275 | 0.291169 |
| SOCS3       | A_87_P037625 | -0.95225 | 11.52355 | -7.14897 | 0.000192 | 0.07862  | 1.305907 |
| LOC415531   | A_87_P024595 | -0.95968 | 8.695207 | -5.79844 | 0.000683 | 0.097029 | 0.125205 |
| GSTA1       | A_87_P009500 | -0.9607  | 11.77119 | -6.60961 | 0.000312 | 0.085477 | 0.864345 |
| BU308605    | A_87_P030119 | -0.96711 | 8.052488 | -6.13655 | 0.000488 | 0.089473 | 0.450563 |
| NUDT6       | A_87_P032440 | -0.98851 | 8.152001 | -5.8672  | 0.000637 | 0.097029 | 0.196755 |
| CR385677    | A_87_P016995 | -1.00566 | 7.449435 | -6.97512 | 0.000224 | 0.082384 | 1.162382 |
| FABP3       | A_87_P021934 | -1.00763 | 10.53447 | -5.02828 | 0.001551 | 0.116808 | -0.62993 |
| CR389027    | A_87_P015076 | -1.02452 | 7.508749 | -6.09584 | 0.000508 | 0.089473 | 0.404251 |
| CR523002    | A_87_P011912 | -1.02507 | 9.70337  | -6.22608 | 0.000448 | 0.087228 | 0.529606 |
| BU296863    | A_87_P030431 | -1.04575 | 7.194878 | -6.29486 | 0.000419 | 0.086348 | 0.584412 |
| BU484898    | A_87_P039937 | -1.04646 | 10.40774 | -6.55197 | 0.000329 | 0.086348 | 0.831124 |
| NOXO1       | A_87_P010984 | -1.05554 | 6.788754 | -5.923   | 0.000603 | 0.09363  | 0.255592 |
| BLMH        | A_87_P038228 | -1.06134 | 9.45922  | -5.6554  | 0.000791 | 0.097953 | -4.7E-06 |
| SLC37A2     | A_87_P023260 | -1.06202 | 9.498505 | -6.64116 | 0.000303 | 0.085477 | 0.906682 |
| C-16        | A_87_P009336 | -1.07516 | 7.303363 | -6.06596 | 0.000523 | 0.089473 | 0.383595 |
| BU129127    | A_87_P034022 | -1.12502 | 7.144141 | -5.57376 | 0.000861 | 0.099586 | -0.09444 |
| BU123654    | A_87_P034186 | -1.14116 | 7.78349  | -6.81573 | 0.000258 | 0.083449 | 1.042131 |
| MLF1        | A_87_P010877 | -1.14159 | 6.256189 | -6.21063 | 0.000454 | 0.087483 | 0.515439 |
| FABP3       | A_87_P021933 | -1.14241 | 9.764458 | -5.58004 | 0.000856 | 0.099586 | -0.08578 |
| CR389681    | A_87_P014658 | -1.15207 | 10.46053 | -7.0309  | 0.000213 | 0.080161 | 1.218217 |
| CR353647    | A_87_P017801 | -1.17466 | 7.063261 | -6.80981 | 0.00026  | 0.083449 | 1.028789 |
| RCJMB04_7d1 | A_87_P036816 | -1.17523 | 10.38491 | -6.32241 | 0.000408 | 0.086348 | 0.617447 |
| TC191392    | A_87_P034248 | -1.17678 | 6.120014 | -6.28411 | 0.000423 | 0.086348 | 0.578596 |

|               |              |          |          |          |          |          |          |
|---------------|--------------|----------|----------|----------|----------|----------|----------|
| 1700012B18RIK | A_87_P011567 | -1.17796 | 11.22739 | -6.09591 | 0.000508 | 0.089473 | 0.408751 |
| TC206107      | A_87_P004587 | -1.20014 | 9.360992 | -5.79809 | 0.000684 | 0.097029 | 0.124717 |
| GSTT1         | A_87_P009143 | -1.20746 | 10.94061 | -9.32235 | 3.56E-05 | 0.048313 | 2.729175 |
| TC220248      | A_87_P002700 | -1.22657 | 7.208018 | -5.93598 | 0.000595 | 0.092766 | 0.255998 |
| TC199001      | A_87_P006979 | -1.23195 | 9.871338 | -5.7559  | 0.000714 | 0.097039 | 0.099248 |
| BU490772      | A_87_P025233 | -1.28838 | 7.050169 | -6.06231 | 0.000525 | 0.089473 | 0.376694 |
| GCG           | A_87_P008759 | -1.29049 | 7.222154 | -6.60167 | 0.000314 | 0.085477 | 0.852154 |
| CR523709      | A_87_P011424 | -1.33025 | 6.544542 | -7.2236  | 0.00018  | 0.076686 | 1.352546 |
| LOC418700     | A_87_P019694 | -1.35654 | 7.713938 | -7.6176  | 0.000129 | 0.075518 | 1.656263 |
| TC202539      | A_87_P006253 | -1.39052 | 9.717155 | -7.90162 | 0.000103 | 0.068632 | 1.866912 |
| TC191391      | A_87_P007845 | -1.42504 | 7.693566 | -10.4968 | 1.64E-05 | 0.029984 | 3.328977 |
| LOC418060     | A_87_P021136 | -1.44567 | 7.909738 | -7.47325 | 0.000146 | 0.075518 | 1.544862 |
| TC193806      | A_87_P007610 | -1.44895 | 8.416028 | -6.91354 | 0.000237 | 0.082384 | 1.114803 |
| BU417024      | A_87_P039183 | -1.46128 | 6.133697 | -6.66841 | 0.000295 | 0.085477 | 0.911282 |
| LOC395708     | A_87_P008896 | -1.66586 | 8.434461 | -11.2793 | 1.02E-05 | 0.025232 | 3.675195 |
| CR387293      | A_87_P015918 | -1.71259 | 9.202857 | -8.08243 | 8.9E-05  | 0.067942 | 1.990331 |
| LOC422306     | A_87_P030446 | -1.71323 | 7.996071 | -7.54695 | 0.000137 | 0.075518 | 1.613669 |
| LOC418790     | A_87_P021778 | -1.83449 | 12.14388 | -8.11273 | 8.69E-05 | 0.067942 | 2.029461 |
| CV862752      | A_87_P009844 | -1.87884 | 9.642913 | -8.7631  | 5.31E-05 | 0.060373 | 2.458908 |
| FGG           | A_87_P037916 | -1.9518  | 7.065645 | -6.12678 | 0.000493 | 0.089473 | 0.441441 |
| ELA1          | A_87_P023858 | -2.10205 | 10.67685 | -11.7671 | 7.69E-06 | 0.021588 | 3.872248 |
| TC193162      | A_87_P007669 | -2.10231 | 11.02518 | -10.0962 | 2.12E-05 | 0.037098 | 3.135977 |
| TC197901      | A_87_P007125 | -2.12509 | 9.163066 | -14.5202 | 1.88E-06 | 0.007192 | 4.767016 |
| PRSS3         | A_87_P009139 | -2.72757 | 6.613198 | -7.06065 | 0.000208 | 0.07965  | 1.247839 |
| K123          | A_87_P008724 | -2.89887 | 7.23779  | -9.56666 | 3.01E-05 | 0.045273 | 2.862688 |
| CPB1          | A_87_P022185 | -3.38717 | 9.01057  | -18.063  | 4.27E-07 | 0.002248 | 5.535204 |
| CPA1          | A_87_P008876 | -4.00424 | 13.40686 | -18.8308 | 3.22E-07 | 0.001934 | 5.6625   |

|           |              |          |          |          |          |          |          |
|-----------|--------------|----------|----------|----------|----------|----------|----------|
| LOC430670 | A_87_P021646 | -4.11023 | 8.782912 | -15.4323 | 1.24E-06 | 0.005823 | 4.998362 |
| CPA2      | A_87_P021751 | -4.30228 | 10.21274 | -26.0532 | 3.47E-08 | 0.000365 | 6.456055 |
| PNLIP     | A_87_P023861 | -4.36029 | 10.82498 | -10.8322 | 1.33E-05 | 0.026691 | 3.482149 |
|           |              |          |          |          |          |          |          |
|           |              |          |          |          |          |          |          |

# Garlic

## Up-regulated

| GeneName     | Agilent ID   | logFC    | AveExpr  | t        | PValue   | adjPVal  | B        |
|--------------|--------------|----------|----------|----------|----------|----------|----------|
| TC223018     | A_87_P002214 | 5.417267 | 9.922726 | 21.65377 | 1.24E-07 | 0.002485 | 7.664505 |
| TC210123     | A_87_P003854 | 4.36885  | 8.914388 | 14.24953 | 2.13E-06 | 0.002807 | 5.557162 |
| CR386395     | A_87_P016505 | 3.62175  | 8.743256 | 8.295579 | 7.54E-05 | 0.010005 | 2.238525 |
| PLEKHQ1      | A_87_P027367 | 3.472835 | 7.2908   | 15.64114 | 1.14E-06 | 0.00272  | 6.073271 |
| LOC420585    | A_87_P028929 | 3.381939 | 7.739128 | 10.20521 | 1.97E-05 | 0.005308 | 3.5532   |
| GDF2         | A_87_P009507 | 3.192406 | 8.844506 | 8.301486 | 7.51E-05 | 0.010005 | 2.243076 |
| CR390009     | A_87_P014428 | 3.182333 | 9.182793 | 10.09602 | 2.12E-05 | 0.005397 | 3.48574  |
| CR386260     | A_87_P016602 | 3.143616 | 8.196046 | 12.8939  | 4.18E-06 | 0.003255 | 4.979359 |
| ARC          | A_87_P037475 | 3.142328 | 7.985849 | 11.27555 | 1.02E-05 | 0.004019 | 4.171977 |
| CN236254     | A_87_P020473 | 3.052023 | 7.208837 | 8.660481 | 5.72E-05 | 0.008924 | 2.51356  |
| BU479212     | A_87_P025451 | 3.027008 | 8.588658 | 7.141192 | 0.000194 | 0.013667 | 1.281258 |
| CO503580     | A_87_P041957 | 2.992013 | 7.078729 | 7.470625 | 0.000146 | 0.012484 | 1.568831 |
| CR406944     | A_87_P012419 | 2.987838 | 7.435867 | 8.73902  | 5.4E-05  | 0.008548 | 2.57117  |
| APOB         | A_87_P034149 | 2.953624 | 8.427088 | 6.215236 | 0.000452 | 0.020298 | 0.40416  |
| RCJMB04_21j5 | A_87_P012102 | 2.938946 | 10.45699 | 19.70112 | 2.36E-07 | 0.002485 | 7.239298 |
| CD760819     | A_87_P021203 | 2.896273 | 6.716274 | 9.381864 | 3.41E-05 | 0.007046 | 3.022757 |
| DYNC1H1      | A_87_P038038 | 2.864114 | 7.552734 | 12.20606 | 6.03E-06 | 0.003338 | 4.653319 |
| BU455240     | A_87_P026343 | 2.820383 | 7.580348 | 10.60088 | 1.54E-05 | 0.004896 | 3.790704 |
| BU247950     | A_87_P031712 | 2.820165 | 9.674958 | 7.903669 | 0.000103 | 0.011183 | 1.928998 |
| TC186301     | A_87_P008359 | 2.812524 | 14.53735 | 7.483966 | 0.000145 | 0.012484 | 1.580224 |
| CR390040     | A_87_P014407 | 2.809063 | 8.328124 | 6.956364 | 0.000228 | 0.014727 | 1.114508 |
| BU415738     | A_87_P027727 | 2.79161  | 6.845288 | 5.720439 | 0.00074  | 0.02526  | -0.11003 |

|           |              |          |          |          |          |          |          |
|-----------|--------------|----------|----------|----------|----------|----------|----------|
| BX931974  | A_87_P023710 | 2.766386 | 7.308088 | 11.79599 | 7.57E-06 | 0.003598 | 4.447201 |
| BX277386  | A_87_P037368 | 2.75407  | 7.799524 | 6.162587 | 0.000476 | 0.020914 | 0.351027 |
| TC200204  | A_87_P006807 | 2.697556 | 8.072637 | 7.526793 | 0.00014  | 0.012363 | 1.616668 |
| LOC425139 | A_87_P014925 | 2.693621 | 9.1819   | 11.18697 | 1.08E-05 | 0.004057 | 4.123544 |
| CRH       | A_87_P037220 | 2.672877 | 6.730633 | 7.189482 | 0.000186 | 0.013504 | 1.324174 |
| CR390166  | A_87_P014333 | 2.661301 | 8.688592 | 10.13755 | 2.06E-05 | 0.005397 | 3.511494 |
| FZR1      | A_87_P037626 | 2.65754  | 15.15082 | 8.399965 | 6.96E-05 | 0.009762 | 2.318465 |
| CR391365  | A_87_P013511 | 2.646549 | 7.535799 | 11.57909 | 8.56E-06 | 0.00373  | 4.334403 |
| LOC419671 | A_87_P011329 | 2.629356 | 7.322559 | 6.800534 | 0.000262 | 0.015526 | 0.970792 |
| TC194119  | A_87_P007570 | 2.607279 | 8.275533 | 6.776351 | 0.000268 | 0.015631 | 0.948227 |
| TC198879  | A_87_P006998 | 2.599557 | 7.363867 | 6.94827  | 0.000229 | 0.014768 | 1.107115 |
| CN237892  | A_87_P040742 | 2.572242 | 7.728358 | 11.13046 | 1.11E-05 | 0.004109 | 4.092393 |
| BU423426  | A_87_P027415 | 2.564211 | 10.30395 | 7.140496 | 0.000194 | 0.013667 | 1.280636 |
| LOC421179 | A_87_P026850 | 2.509674 | 8.179382 | 6.611477 | 0.000311 | 0.016687 | 0.792481 |
| MDK       | A_87_P009319 | 2.497724 | 7.159742 | 6.048145 | 0.000532 | 0.021842 | 0.234256 |
| AJ455964  | A_87_P037269 | 2.483443 | 7.851321 | 7.134953 | 0.000195 | 0.013667 | 1.275693 |
| LOC423636 | A_87_P030019 | 2.457692 | 6.904272 | 8.401575 | 6.95E-05 | 0.009762 | 2.31969  |
| CO771160  | A_87_P019220 | 2.454038 | 6.566678 | 6.19809  | 0.00046  | 0.020506 | 0.386897 |
| LOC425289 | A_87_P012241 | 2.429191 | 7.239367 | 9.101617 | 4.16E-05 | 0.007534 | 2.830159 |
| TC226737  | A_87_P000466 | 2.42582  | 7.763476 | 9.466326 | 3.22E-05 | 0.006847 | 3.079557 |
| BU104894  | A_87_P034768 | 2.424214 | 6.423518 | 6.139797 | 0.000487 | 0.021039 | 0.327914 |
| TC221798  | A_87_P002470 | 2.41321  | 7.539481 | 7.534729 | 0.000139 | 0.012358 | 1.623399 |
| GLT25D2   | A_87_P017120 | 2.401886 | 7.149251 | 8.48612  | 6.52E-05 | 0.00966  | 2.383674 |
| LFNG      | A_87_P008992 | 2.390865 | 7.951289 | 9.082252 | 4.21E-05 | 0.007534 | 2.816611 |
| CV858659  | A_87_P010532 | 2.350559 | 7.476356 | 7.843168 | 0.000108 | 0.011582 | 1.879852 |
| AJ739127  | A_87_P035851 | 2.32505  | 7.439919 | 8.967787 | 4.57E-05 | 0.007889 | 2.735884 |
| M27663    | A_87_P009373 | 2.316347 | 7.924457 | 7.475596 | 0.000146 | 0.012484 | 1.573079 |

|           |              |          |          |          |          |          |          |
|-----------|--------------|----------|----------|----------|----------|----------|----------|
| LOC423162 | A_87_P023103 | 2.314943 | 7.492054 | 11.30224 | 1.01E-05 | 0.004019 | 4.186479 |
| TNNT3     | A_87_P009388 | 2.310754 | 7.181178 | 7.536874 | 0.000138 | 0.012358 | 1.625217 |
| BU226241  | A_87_P032548 | 2.283567 | 6.561791 | 5.944466 | 0.00059  | 0.022836 | 0.126936 |
| WHSC1L1   | A_87_P013214 | 2.2701   | 9.44192  | 8.35346  | 7.21E-05 | 0.009762 | 2.282978 |
| DYNC1H1   | A_87_P008121 | 2.266514 | 10.70518 | 13.04516 | 3.86E-06 | 0.003253 | 5.047927 |
| ZDHHC5    | A_87_P035034 | 2.261976 | 6.815334 | 7.273081 | 0.000173 | 0.013035 | 1.397845 |
| CR388868  | A_87_P015174 | 2.258443 | 7.894729 | 9.651052 | 2.84E-05 | 0.006497 | 3.201828 |
| BU417989  | A_87_P027684 | 2.226168 | 6.413987 | 8.800759 | 5.16E-05 | 0.008358 | 2.616072 |
| CR390868  | A_87_P013879 | 2.201505 | 6.670342 | 6.407396 | 0.000376 | 0.018153 | 0.594997 |
| PHOX2     | A_87_P008691 | 2.199162 | 7.076713 | 6.694375 | 0.000288 | 0.016116 | 0.871208 |
| CDON      | A_87_P020225 | 2.181635 | 6.648162 | 7.412787 | 0.000154 | 0.012734 | 1.519214 |
| AJ728686  | A_87_P035890 | 2.176365 | 6.565869 | 6.257233 | 0.000434 | 0.019879 | 0.446281 |
| SPEN      | A_87_P033540 | 2.160839 | 7.678228 | 9.481601 | 3.19E-05 | 0.00682  | 3.089769 |
| BU373614  | A_87_P028711 | 2.158572 | 8.163094 | 7.832652 | 0.000109 | 0.011582 | 1.871272 |
| CR386893  | A_87_P016179 | 2.155938 | 9.32154  | 7.154854 | 0.000191 | 0.013667 | 1.293426 |
| TNPO3     | A_87_P016263 | 2.144692 | 7.527136 | 9.87332  | 2.45E-05 | 0.005922 | 3.345482 |
| HCRT      | A_87_P014389 | 2.113268 | 8.788928 | 8.234214 | 7.91E-05 | 0.010115 | 2.191048 |
| CR406193  | A_87_P012941 | 2.105225 | 9.072681 | 10.65308 | 1.49E-05 | 0.004857 | 3.821244 |
| CN234081  | A_87_P020521 | 2.101173 | 6.349822 | 10.37234 | 1.77E-05 | 0.005218 | 3.654832 |
| BU268923  | A_87_P031191 | 2.097826 | 6.810877 | 7.534287 | 0.000139 | 0.012358 | 1.623024 |
| TC203225  | A_87_P005875 | 2.091986 | 14.69902 | 10.3576  | 1.79E-05 | 0.005228 | 3.645946 |
| MGAT5     | A_87_P016016 | 2.084338 | 8.754848 | 8.849984 | 4.98E-05 | 0.008237 | 2.651634 |
| TC207295  | A_87_P004132 | 2.08427  | 6.849754 | 6.407505 | 0.000376 | 0.018153 | 0.595104 |
| LOC418607 | A_87_P017318 | 2.082023 | 8.679819 | 11.78789 | 7.6E-06  | 0.003598 | 4.443033 |
| BU470394  | A_87_P025748 | 2.062785 | 7.051337 | 6.4267   | 0.00037  | 0.018011 | 0.613905 |
| TC224509  | A_87_P001374 | 2.052643 | 6.756692 | 6.895874 | 0.00024  | 0.015028 | 1.059064 |
| BU387573  | A_87_P028278 | 2.007733 | 7.037257 | 7.144932 | 0.000193 | 0.013667 | 1.28459  |

|                   |              |          |          |          |          |          |          |
|-------------------|--------------|----------|----------|----------|----------|----------|----------|
| TC202794          | A_87_P006118 | 1.984307 | 7.037863 | 5.876608 | 0.000631 | 0.023524 | 0.055896 |
| ABHD6             | A_87_P013037 | 1.98111  | 6.361032 | 6.235872 | 0.000443 | 0.020124 | 0.424886 |
| BX262701          | A_87_P025099 | 1.97955  | 7.666799 | 7.258194 | 0.000175 | 0.01306  | 1.384783 |
| LOC424135         | A_87_P030843 | 1.973145 | 8.621746 | 11.72381 | 7.88E-06 | 0.003607 | 4.409961 |
| MDK               | A_87_P029081 | 1.967867 | 6.518566 | 5.444731 | 0.000986 | 0.028242 | -0.41143 |
| LOC430010         | A_87_P021512 | 1.965178 | 8.707549 | 10.24315 | 1.92E-05 | 0.005308 | 3.576439 |
| TC210304          | A_87_P003832 | 1.963803 | 9.830926 | 9.044273 | 4.33E-05 | 0.007689 | 2.789949 |
| BX277609          | A_87_P024840 | 1.94855  | 8.908586 | 8.772201 | 5.27E-05 | 0.008446 | 2.595344 |
| OPCML             | A_87_P037717 | 1.947096 | 6.824025 | 5.26307  | 0.001198 | 0.030688 | -0.61607 |
| LOC427434         | A_87_P022431 | 1.943261 | 8.637726 | 8.463197 | 6.64E-05 | 0.009696 | 2.366392 |
| BRD1              | A_87_P031217 | 1.942316 | 9.767223 | 11.18162 | 1.08E-05 | 0.004057 | 4.120602 |
| TC203827          | A_87_P005544 | 1.925507 | 6.785104 | 8.012501 | 9.4E-05  | 0.010717 | 2.016472 |
| BU120493          | A_87_P034283 | 1.908308 | 6.804688 | 7.190428 | 0.000186 | 0.013504 | 1.325012 |
| KIF5B             | A_87_P007853 | 1.864352 | 10.54807 | 7.863883 | 0.000106 | 0.011428 | 1.896721 |
| LOC417598         | A_87_P007248 | 1.860532 | 9.635278 | 12.58528 | 4.91E-06 | 0.003255 | 4.836018 |
| CTCF              | A_87_P008703 | 1.853838 | 9.822619 | 11.89352 | 7.16E-06 | 0.003598 | 4.497055 |
| TC224651          | A_87_P001292 | 1.847881 | 7.535536 | 5.664719 | 0.000784 | 0.025918 | -0.17006 |
| NKX-2.2           | A_87_P037886 | 1.837636 | 7.488328 | 7.397523 | 0.000155 | 0.012759 | 1.506058 |
| CO770158          | A_87_P019319 | 1.836656 | 6.291328 | 5.383104 | 0.001053 | 0.028955 | -0.4803  |
| TC206022          | A_87_P004642 | 1.828047 | 7.048458 | 6.065012 | 0.000524 | 0.02163  | 0.251576 |
| CDC42BPB          | A_87_P018639 | 1.826955 | 9.222297 | 12.03019 | 6.64E-06 | 0.003493 | 4.56604  |
| TC227424          | A_87_P000116 | 1.825614 | 7.217393 | 6.836751 | 0.000253 | 0.015254 | 1.004453 |
| CR338795          | A_87_P018837 | 1.821955 | 8.141499 | 9.69542  | 2.76E-05 | 0.006402 | 3.230803 |
| CR385664          | A_87_P017003 | 1.816715 | 6.755644 | 7.695271 | 0.000121 | 0.011879 | 1.758127 |
| LOC420214         | A_87_P023888 | 1.816255 | 9.555262 | 12.95627 | 4.05E-06 | 0.003255 | 5.007766 |
| RCJMB04_1111<br>7 | A_87_P036602 | 1.804636 | 11.47125 | 8.600873 | 5.98E-05 | 0.009145 | 2.469467 |

|                   |              |          |          |          |          |          |          |
|-------------------|--------------|----------|----------|----------|----------|----------|----------|
| BU461582          | A_87_P026084 | 1.798394 | 9.215992 | 13.4839  | 3.09E-06 | 0.003144 | 5.240803 |
| RCJMB04_30e3      | A_87_P011423 | 1.783615 | 11.81114 | 13.41669 | 3.2E-06  | 0.003144 | 5.211822 |
| CD727362          | A_87_P021327 | 1.774074 | 6.531663 | 5.879299 | 0.00063  | 0.023523 | 0.058725 |
| APOB              | A_87_P022123 | 1.766774 | 8.584946 | 5.702916 | 0.000753 | 0.025473 | -0.12886 |
| TC227335          | A_87_P000158 | 1.758278 | 6.88685  | 7.174095 | 0.000188 | 0.013591 | 1.310528 |
| RCJMB04_19e2      | A_87_P035599 | 1.751931 | 11.19889 | 7.64797  | 0.000126 | 0.011996 | 1.718716 |
| TC207604          | A_87_P004074 | 1.744403 | 7.306998 | 9.855792 | 2.48E-05 | 0.005957 | 3.334289 |
| CO635711          | A_87_P020191 | 1.711356 | 6.975835 | 11.7869  | 7.61E-06 | 0.003598 | 4.442524 |
| ADIPOR2           | A_87_P037108 | 1.709929 | 11.08546 | 10.4486  | 1.69E-05 | 0.005127 | 3.700559 |
| BU415119          | A_87_P027742 | 1.702494 | 6.82061  | 5.827456 | 0.000664 | 0.024048 | 0.004041 |
| OLIG3             | A_87_P037632 | 1.699857 | 6.704635 | 6.919412 | 0.000235 | 0.014931 | 1.080691 |
| BU391107          | A_87_P028183 | 1.683482 | 6.958768 | 7.905645 | 0.000102 | 0.011183 | 1.930596 |
| AADAC             | A_87_P023433 | 1.679254 | 6.686007 | 7.474987 | 0.000146 | 0.012484 | 1.572558 |
| CR389707          | A_87_P014643 | 1.677874 | 7.115202 | 9.307844 | 3.59E-05 | 0.007057 | 2.97251  |
| CV859110          | A_87_P010492 | 1.672093 | 8.213298 | 6.676978 | 0.000293 | 0.016147 | 0.854756 |
| BU421848          | A_87_P027483 | 1.665532 | 6.488086 | 7.590919 | 0.000132 | 0.012186 | 1.670866 |
| UBXD2             | A_87_P022336 | 1.648795 | 9.896447 | 12.25758 | 5.86E-06 | 0.003319 | 4.678578 |
| CSPG5             | A_87_P008748 | 1.646708 | 6.166809 | 6.796723 | 0.000263 | 0.015558 | 0.967241 |
| LOC418850         | A_87_P003958 | 1.646565 | 10.18271 | 12.38481 | 5.47E-06 | 0.003319 | 4.740357 |
| BU305794          | A_87_P030191 | 1.634162 | 7.504305 | 7.151137 | 0.000192 | 0.013667 | 1.290118 |
| CO757296          | A_87_P020145 | 1.633027 | 6.223491 | 6.237613 | 0.000443 | 0.020124 | 0.426631 |
| CR385621          | A_87_P017031 | 1.632155 | 6.845923 | 5.217563 | 0.001259 | 0.031508 | -0.6681  |
| RCJMB04_22k1<br>3 | A_87_P009183 | 1.632036 | 7.357983 | 7.040059 | 0.000212 | 0.014372 | 1.19051  |
| BU295088          | A_87_P030477 | 1.613234 | 6.369213 | 6.182537 | 0.000467 | 0.020624 | 0.371204 |
| TC220349          | A_87_P002688 | 1.608801 | 7.059313 | 5.789902 | 0.000689 | 0.024466 | -0.0358  |
| CRYBA1            | A_87_P009400 | 1.598227 | 7.182145 | 6.221372 | 0.00045  | 0.020265 | 0.410329 |

|              |              |          |          |          |          |          |          |
|--------------|--------------|----------|----------|----------|----------|----------|----------|
| IRS-1        | A_87_P009216 | 1.591721 | 6.759091 | 5.536807 | 0.000895 | 0.027309 | -0.30955 |
| LOC416529    | A_87_P016175 | 1.572861 | 7.016567 | 10.32034 | 1.83E-05 | 0.005242 | 3.623414 |
| ANKRD11      | A_87_P041632 | 1.534698 | 10.30644 | 10.75608 | 1.39E-05 | 0.004624 | 3.880983 |
| BU414476     | A_87_P027750 | 1.517179 | 6.296522 | 4.793834 | 0.002023 | 0.039493 | -1.1676  |
| CASZ1        | A_87_P023401 | 1.512518 | 6.413517 | 6.901425 | 0.000239 | 0.015028 | 1.064171 |
| TC219891     | A_87_P002751 | 1.508501 | 6.877864 | 6.940866 | 0.000231 | 0.014825 | 1.100344 |
| RCJMB04_20d5 | A_87_P036326 | 1.507354 | 7.193692 | 6.109252 | 0.000501 | 0.021297 | 0.296826 |
| BU424987     | A_87_P041883 | 1.505333 | 6.308624 | 5.715562 | 0.000744 | 0.02526  | -0.11527 |
| TC225719     | A_87_P000887 | 1.499034 | 7.156528 | 7.726556 | 0.000118 | 0.011823 | 1.784066 |
| CR523642     | A_87_P011476 | 1.490371 | 6.81085  | 6.175345 | 0.00047  | 0.020722 | 0.363936 |
| BU446674     | A_87_P026707 | 1.481507 | 6.019076 | 6.106836 | 0.000503 | 0.021304 | 0.294361 |
| TC222502     | A_87_P002382 | 1.481365 | 8.892461 | 7.613862 | 0.00013  | 0.012149 | 1.69015  |
| LOC416214    | A_87_P033333 | 1.474362 | 6.999075 | 7.284445 | 0.000171 | 0.01303  | 1.407799 |
| BM426314     | A_87_P034888 | 1.458408 | 6.203328 | 7.831374 | 0.000109 | 0.011582 | 1.870227 |
| BX930578     | A_87_P024243 | 1.456957 | 10.19514 | 9.821661 | 2.53E-05 | 0.006036 | 3.312426 |
| BX260117     | A_87_P025154 | 1.456351 | 7.028143 | 6.071308 | 0.00052  | 0.02156  | 0.258032 |
| AM067107     | A_87_P035373 | 1.442052 | 6.862038 | 6.729752 | 0.000279 | 0.015929 | 0.904547 |
| BX934358     | A_87_P022627 | 1.438792 | 6.75994  | 8.048236 | 9.14E-05 | 0.010646 | 2.044936 |
| TC186792     | A_87_P008265 | 1.43868  | 8.0653   | 6.301505 | 0.000416 | 0.019343 | 0.490431 |
| MEF2A        | A_87_P037524 | 1.436489 | 9.247953 | 9.638986 | 2.86E-05 | 0.006514 | 3.193923 |
| TC194424     | A_87_P007536 | 1.404065 | 8.169236 | 7.540572 | 0.000138 | 0.012358 | 1.62835  |
| LOC426613    | A_87_P023334 | 1.401208 | 7.334105 | 6.116024 | 0.000498 | 0.021242 | 0.303728 |
| HBD          | A_87_P009554 | 1.397616 | 12.83512 | 7.510181 | 0.000141 | 0.012483 | 1.602555 |
| CR352651     | A_87_P018456 | 1.385618 | 9.313825 | 9.672726 | 2.8E-05  | 0.006438 | 3.216002 |
| CO768011     | A_87_P019527 | 1.384532 | 6.596461 | 5.534143 | 0.000898 | 0.027319 | -0.31248 |
| BU228800     | A_87_P032464 | 1.372774 | 5.97449  | 6.289517 | 0.000421 | 0.019522 | 0.478501 |
| LARP1        | A_87_P034758 | 1.36637  | 7.451497 | 6.551608 | 0.000329 | 0.016988 | 0.735093 |

|           |              |          |          |          |          |          |          |
|-----------|--------------|----------|----------|----------|----------|----------|----------|
| LOC419436 | A_87_P002536 | 1.362553 | 6.364257 | 5.501911 | 0.000928 | 0.027523 | -0.34802 |
| RRAS2     | A_87_P014781 | 1.360997 | 10.9093  | 8.13075  | 8.57E-05 | 0.010335 | 2.110179 |
| DN829968  | A_87_P009752 | 1.358651 | 6.157345 | 5.110078 | 0.001417 | 0.033669 | -0.79222 |
| BU476696  | A_87_P025525 | 1.357989 | 6.479473 | 7.005094 | 0.000218 | 0.014595 | 1.158859 |
| VAX1      | A_87_P038172 | 1.352599 | 6.249451 | 5.25343  | 0.001211 | 0.030783 | -0.62706 |
| LOC425243 | A_87_P021357 | 1.351836 | 7.480518 | 7.152227 | 0.000192 | 0.013667 | 1.291088 |
| CR390671  | A_87_P014002 | 1.348874 | 7.690412 | 6.60046  | 0.000314 | 0.016759 | 0.781954 |
| LOC419037 | A_87_P017184 | 1.348352 | 12.52331 | 8.771632 | 5.27E-05 | 0.008446 | 2.594931 |
| CV862615  | A_87_P009876 | 1.332883 | 8.374657 | 5.651054 | 0.000795 | 0.026095 | -0.18485 |
| LOC427047 | A_87_P011568 | 1.32753  | 8.414633 | 8.206221 | 8.08E-05 | 0.010138 | 2.16927  |
| AKT2      | A_87_P037817 | 1.312046 | 7.446635 | 7.718385 | 0.000119 | 0.011823 | 1.777301 |
| TC193639  | A_87_P007630 | 1.307296 | 7.109907 | 6.409651 | 0.000376 | 0.018153 | 0.597208 |
| BU462788  | A_87_P026028 | 1.30336  | 7.376784 | 7.713497 | 0.00012  | 0.011823 | 1.773251 |
| CD217788  | A_87_P021367 | 1.297697 | 6.524163 | 7.430803 | 0.000151 | 0.012703 | 1.534709 |
| BX935775  | A_87_P021947 | 1.296274 | 9.059871 | 8.051797 | 9.12E-05 | 0.010646 | 2.047766 |
| U76305    | A_87_P009023 | 1.294854 | 8.199186 | 5.72287  | 0.000738 | 0.02526  | -0.10742 |
| WDR67     | A_87_P015733 | 1.285835 | 7.068219 | 9.094908 | 4.18E-05 | 0.007534 | 2.825469 |
| CR353864  | A_87_P017683 | 1.283953 | 7.090907 | 6.611939 | 0.000311 | 0.016687 | 0.792922 |
| HS1BP3    | A_87_P018137 | 1.276394 | 7.953201 | 6.157995 | 0.000478 | 0.020944 | 0.346375 |
| CR386490  | A_87_P016444 | 1.26986  | 8.093747 | 7.319776 | 0.000166 | 0.012981 | 1.438652 |
| TEAD3     | A_87_P009075 | 1.244151 | 7.782432 | 7.078804 | 0.000205 | 0.014159 | 1.225416 |
| NHSL1     | A_87_P002050 | 1.2312   | 6.553987 | 6.896143 | 0.00024  | 0.015028 | 1.059312 |
| LOC419750 | A_87_P015390 | 1.210357 | 6.147698 | 5.188096 | 0.0013   | 0.032059 | -0.70195 |
| TC205715  | A_87_P004815 | 1.204017 | 6.062793 | 5.935018 | 0.000596 | 0.022876 | 0.117083 |
| CR389142  | A_87_P015005 | 1.18251  | 7.051845 | 8.092663 | 8.83E-05 | 0.010497 | 2.080147 |
| GBE       | A_87_P035833 | 1.174279 | 7.483263 | 4.104652 | 0.004622 | 0.061693 | -2.03907 |
| BU467197  | A_87_P025869 | 1.168849 | 7.158828 | 6.917129 | 0.000236 | 0.014931 | 1.078596 |

|           |              |          |          |          |          |          |          |
|-----------|--------------|----------|----------|----------|----------|----------|----------|
| ELMOD2    | A_87_P023542 | 1.168116 | 8.189453 | 5.063129 | 0.001492 | 0.034398 | -0.84699 |
| BU397032  | A_87_P040788 | 1.16758  | 6.597443 | 8.643434 | 5.8E-05  | 0.009004 | 2.500983 |
| BU205361  | A_87_P033349 | 1.162494 | 5.990556 | 5.673122 | 0.000777 | 0.02582  | -0.16098 |
| CR523552  | A_87_P011535 | 1.161866 | 6.772858 | 7.766401 | 0.000115 | 0.011732 | 1.816952 |
| BU305923  | A_87_P030186 | 1.134254 | 8.261443 | 6.560201 | 0.000326 | 0.01693  | 0.743357 |
| GRB2      | A_87_P029728 | 1.11274  | 9.467102 | 5.024057 | 0.001559 | 0.035058 | -0.89282 |
| BU452711  | A_87_P026454 | 1.110326 | 6.30809  | 3.688821 | 0.007875 | 0.082955 | -2.59969 |
| LGR5      | A_87_P018440 | 1.099875 | 6.029103 | 7.879663 | 0.000105 | 0.011313 | 1.909542 |
| CR523450  | A_87_P011601 | 1.098468 | 7.711953 | 5.470527 | 0.00096  | 0.027919 | -0.38276 |
| MARK1     | A_87_P021538 | 1.085638 | 9.128538 | 7.604146 | 0.000131 | 0.012158 | 1.681991 |
| CR406691  | A_87_P012600 | 1.084509 | 10.16275 | 8.369973 | 7.12E-05 | 0.009762 | 2.295602 |
| LOC427758 | A_87_P007751 | 1.080391 | 7.146365 | 3.989659 | 0.005342 | 0.066804 | -2.19156 |
| UPP2      | A_87_P022639 | 1.071893 | 6.786706 | 5.690762 | 0.000763 | 0.025669 | -0.14195 |
| CR390958  | A_87_P013821 | 1.061511 | 12.35613 | 6.630634 | 0.000306 | 0.016481 | 0.810749 |
| LMO4      | A_87_P037569 | 1.059354 | 8.768973 | 6.735645 | 0.000278 | 0.015928 | 0.910085 |
| BU425544  | A_87_P027321 | 1.05914  | 7.753464 | 6.336402 | 0.000403 | 0.01892  | 0.525052 |
| CD733169  | A_87_P021265 | 1.051037 | 6.585147 | 7.676766 | 0.000123 | 0.011899 | 1.742737 |
| MYOG      | A_87_P009757 | 1.032767 | 5.906094 | 5.445578 | 0.000985 | 0.028236 | -0.41048 |
| LOC420679 | A_87_P022679 | 1.03243  | 7.253527 | 6.099652 | 0.000506 | 0.021327 | 0.287029 |
| CR522893  | A_87_P011989 | 1.03196  | 8.455516 | 6.481395 | 0.000351 | 0.017494 | 0.667214 |
| LOC415476 | A_87_P034974 | 1.02762  | 8.097802 | 5.540002 | 0.000892 | 0.027309 | -0.30604 |
| LOC422838 | A_87_P026888 | 1.021924 | 8.925267 | 7.356268 | 0.000161 | 0.012903 | 1.470374 |
| CR390688  | A_87_P013990 | 1.017507 | 8.913598 | 5.982912 | 0.000568 | 0.022657 | 0.166903 |
| LOC415553 | A_87_P021890 | 1.008216 | 8.779147 | 6.506672 | 0.000343 | 0.017317 | 0.691723 |
| APOB      | A_87_P012184 | 1.004595 | 9.614417 | 3.647515 | 0.008315 | 0.085377 | -2.65672 |
| ELA1      | A_87_P023858 | 0.987266 | 10.67685 | 5.526656 | 0.000905 | 0.027396 | -0.32072 |
| LOC395818 | A_87_P009087 | 0.920015 | 7.258798 | 6.276797 | 0.000426 | 0.019697 | 0.465822 |

|           |              |          |          |          |          |          |          |
|-----------|--------------|----------|----------|----------|----------|----------|----------|
| FZR1      | A_87_P037627 | 0.907587 | 6.220306 | 5.271752 | 0.001187 | 0.030675 | -0.60618 |
| BU332246  | A_87_P029583 | 0.904321 | 6.096583 | 5.4669   | 0.000963 | 0.027948 | -0.38679 |
| CR385965  | A_87_P016795 | 0.899303 | 5.89569  | 6.631518 | 0.000305 | 0.016481 | 0.811592 |
| CPA1      | A_87_P008876 | 0.884935 | 13.40686 | 4.161598 | 0.004305 | 0.059338 | -1.96429 |
| BU460481  | A_87_P026133 | 0.88388  | 7.71433  | 4.540935 | 0.002717 | 0.045969 | -1.47886 |
| LHX1      | A_87_P009469 | 0.878037 | 5.904062 | 5.806967 | 0.000678 | 0.024292 | -0.01767 |
| BU229541  | A_87_P032429 | 0.874057 | 9.5082   | 6.282254 | 0.000424 | 0.019616 | 0.471265 |
| BX260970  | A_87_P025138 | 0.866904 | 11.04211 | 5.723426 | 0.000738 | 0.02526  | -0.10682 |
| BG713524  | A_87_P041329 | 0.859105 | 8.800377 | 5.107631 | 0.00142  | 0.033722 | -0.79507 |
| ANKRD11   | A_87_P016287 | 0.829109 | 10.29186 | 3.387815 | 0.011769 | 0.102913 | -3.02046 |
| LOC418850 | A_87_P010987 | 0.828382 | 7.096828 | 4.918889 | 0.001754 | 0.036715 | -1.01733 |
| LOC419752 | A_87_P025507 | 0.824746 | 8.934367 | 5.342726 | 0.0011   | 0.029557 | -0.52574 |
| ABCD2     | A_87_P012773 | 0.821795 | 9.228287 | 5.071709 | 0.001478 | 0.03424  | -0.83695 |
| GBX-1     | A_87_P038146 | 0.820149 | 6.663906 | 4.290271 | 0.003674 | 0.054504 | -1.79715 |
| TC223629  | A_87_P001871 | 0.789825 | 6.396773 | 5.342872 | 0.001099 | 0.029557 | -0.52557 |
| TC226823  | A_87_P000414 | 0.781267 | 7.131516 | 3.760223 | 0.007173 | 0.07861  | -2.50165 |
| LOC419752 | A_87_P008020 | 0.773261 | 8.024437 | 2.020798 | 0.083345 | 0.320754 | -5.01003 |
| CR353938  | A_87_P017639 | 0.768199 | 9.818816 | 5.367078 | 0.001071 | 0.029216 | -0.49831 |
| CR352797  | A_87_P018359 | 0.735624 | 6.479242 | 4.866124 | 0.001862 | 0.037936 | -1.08044 |
| BU223011  | A_87_P032666 | 0.716286 | 6.517572 | 4.998849 | 0.001603 | 0.0354   | -0.92251 |
| GCG       | A_87_P008759 | 0.709982 | 7.222154 | 3.632002 | 0.008487 | 0.086001 | -2.6782  |
| CR390595  | A_87_P014045 | 0.704693 | 12.75921 | 4.401226 | 0.003211 | 0.050698 | -1.65506 |
| CR386677  | A_87_P016317 | 0.699334 | 6.429055 | 3.527261 | 0.009754 | 0.092896 | -2.82408 |
| LOC416235 | A_87_P018176 | 0.69185  | 8.182308 | 4.527607 | 0.00276  | 0.046421 | -1.49554 |
| LOC396450 | A_87_P009378 | 0.686717 | 6.499232 | 4.155875 | 0.004336 | 0.059567 | -1.97179 |
| SLC24A2   | A_87_P037824 | 0.655666 | 8.896764 | 4.758116 | 0.002108 | 0.040326 | -1.21096 |
| LOC419672 | A_87_P027565 | 0.642339 | 6.314449 | 3.599755 | 0.008857 | 0.088175 | -2.72296 |

|              |              |          |          |          |          |          |          |
|--------------|--------------|----------|----------|----------|----------|----------|----------|
| CR353205     | A_87_P018094 | 0.615056 | 7.355828 | 3.705369 | 0.007706 | 0.081808 | -2.57691 |
| RCJMB04_7d18 | A_87_P036813 | 0.607024 | 9.673969 | 3.860362 | 0.006301 | 0.073329 | -2.36537 |
| LOC417506    | A_87_P017838 | 0.600836 | 6.06158  | 3.942144 | 0.005674 | 0.068878 | -2.25515 |
| LOC419671    | A_87_P011480 | 0.595238 | 5.884477 | 3.229389 | 0.014617 | 0.116225 | -3.24635 |
| RPLP2        | A_87_P021942 | 0.582678 | 11.79978 | 4.291944 | 0.003666 | 0.054504 | -1.79499 |
| LOC430267    | A_87_P021385 | 0.569409 | 6.102752 | 3.861279 | 0.006293 | 0.073323 | -2.36413 |
| CR352647     | A_87_P018460 | 0.544033 | 8.590207 | 4.143156 | 0.004405 | 0.059953 | -1.98845 |
| NHSL1        | A_87_P000961 | 0.536987 | 6.169901 | 2.75327  | 0.028586 | 0.171751 | -3.93902 |
| CUBN         | A_87_P015770 | 0.528699 | 11.1799  | 3.998419 | 0.005283 | 0.06628  | -2.17988 |
| TC188062     | A_87_P008155 | 0.510781 | 6.77842  | 3.942892 | 0.005669 | 0.068847 | -2.25415 |
| TC191391     | A_87_P007845 | 0.505862 | 7.693566 | 3.726168 | 0.007499 | 0.080752 | -2.54832 |
| SPEN         | A_87_P005488 | 0.477551 | 5.995002 | 2.906675 | 0.022963 | 0.151503 | -3.71409 |
| SPEN         | A_87_P015114 | 0.436473 | 6.01671  | 3.01146  | 0.019802 | 0.13904  | -3.56127 |
| LARP1        | A_87_P014677 | 0.428841 | 6.327151 | 2.748646 | 0.028776 | 0.172403 | -3.94581 |
| AADAC        | A_87_P024018 | 0.395282 | 7.966028 | 1.077844 | 0.317103 | 0.648588 | -6.21336 |
| APOB         | A_87_P009392 | 0.384118 | 15.69096 | 1.686649 | 0.135862 | 0.420324 | -5.47517 |
| CUBN         | A_87_P006481 | 0.338671 | 5.561673 | 1.83295  | 0.109797 | 0.374043 | -5.27495 |
| CRYBA1       | A_87_P019019 | 0.336732 | 5.441549 | 1.970971 | 0.08968  | 0.334929 | -5.08101 |
| ANKRD11      | A_87_P038543 | 0.327275 | 5.987283 | 1.173634 | 0.279206 | 0.609622 | -6.1105  |
| LOC420585    | A_87_P024094 | 0.268939 | 5.403571 | 1.868722 | 0.104197 | 0.363565 | -5.2251  |
| NHSL1        | A_87_P023191 | 0.264609 | 6.55258  | 1.947044 | 0.092888 | 0.341176 | -5.11493 |
| LOC421179    | A_87_P038022 | 0.212611 | 5.467891 | 1.051823 | 0.328088 | 0.659591 | -6.24024 |
| BRD1         | A_87_P018384 | 0.212481 | 5.796926 | 1.549037 | 0.16563  | 0.470416 | -5.65713 |
| LOC422838    | A_87_P005240 | 0.101275 | 6.023572 | 0.688516 | 0.513458 | 0.802074 | -6.56091 |
| SPEN         | A_87_P007302 | 0.082917 | 5.609021 | 0.554598 | 0.596565 | 0.847875 | -6.64995 |
| ABHD6        | A_87_P026925 | 0.076519 | 13.33248 | 0.35937  | 0.729994 | 0.909909 | -6.74772 |
| ANKRD11      | A_87_P028441 | 0.069055 | 5.858476 | 0.421663 | 0.686013 | 0.890771 | -6.72081 |

|           |              |          |          |          |          |          |          |
|-----------|--------------|----------|----------|----------|----------|----------|----------|
| SPEN      | A_87_P007724 | 0.068915 | 5.398131 | 0.376505 | 0.717778 | 0.904967 | -6.74073 |
| DYNC1H1   | A_87_P008241 | 0.06566  | 5.870267 | 0.429503 | 0.680564 | 0.888354 | -6.71714 |
| LOC416214 | A_87_P015049 | 0.056882 | 5.78895  | 0.421901 | 0.685847 | 0.890721 | -6.7207  |
| LARP1     | A_87_P015360 | 0.044132 | 5.313377 | 0.310887 | 0.765008 | 0.924873 | -6.76579 |

## Garlic

### Down-regulated

|           |              |          |          |          |          |          |          |
|-----------|--------------|----------|----------|----------|----------|----------|----------|
| CPA2      | A_87_P021751 | -0.00313 | 5.384217 | -0.01799 | 0.986153 | 0.99619  | -6.81986 |
| BRD1      | A_87_P034947 | -0.00595 | 7.330342 | -0.03286 | 0.974711 | 0.993156 | -6.81943 |
| CDON      | A_87_P015827 | -0.02965 | 6.587412 | -0.15771 | 0.879175 | 0.964002 | -6.80601 |
| CDC42BPB  | A_87_P032380 | -0.06275 | 6.698886 | -0.38716 | 0.710223 | 0.901273 | -6.73622 |
| TNNT3     | A_87_P034373 | -0.10802 | 5.292242 | -0.80195 | 0.449139 | 0.759738 | -6.47253 |
| GRB2      | A_87_P009495 | -0.10998 | 5.315705 | -0.74136 | 0.48278  | 0.782394 | -6.52117 |
| PLEKHQ1   | A_87_P012444 | -0.12579 | 5.346288 | -0.8713  | 0.412686 | 0.732583 | -6.41301 |
| UPP2      | A_87_P012718 | -0.19922 | 8.058923 | -1.15236 | 0.287282 | 0.617512 | -6.13386 |
| LOC418607 | A_87_P033600 | -0.33404 | 9.179022 | -2.02818 | 0.082445 | 0.318358 | -4.99948 |
| AADAC     | A_87_P034264 | -0.33828 | 5.847187 | -2.11444 | 0.072615 | 0.296879 | -4.8755  |
| DYNC1H1   | A_87_P019789 | -0.39333 | 10.70052 | -2.29002 | 0.056087 | 0.255429 | -4.62023 |
| KIF5B     | A_87_P022772 | -0.42251 | 6.491169 | -2.30428 | 0.054925 | 0.252321 | -4.59937 |
| GLT25D2   | A_87_P027152 | -0.43103 | 5.81651  | -2.27991 | 0.056926 | 0.257728 | -4.63501 |
| CR732995  | A_87_P010849 | -0.51583 | 7.634547 | -3.51562 | 0.009907 | 0.093759 | -2.84037 |
| LOC419037 | A_87_P015156 | -0.57636 | 10.36378 | -3.7788  | 0.007002 | 0.077935 | -2.47627 |
| UGP2      | A_87_P036732 | -0.59206 | 11.4386  | -3.72528 | 0.007508 | 0.080759 | -2.54954 |
| C-16      | A_87_P009336 | -0.61711 | 7.303363 | -3.48166 | 0.010369 | 0.096202 | -2.88803 |
| BU484898  | A_87_P039937 | -0.63087 | 10.40774 | -3.94994 | 0.005618 | 0.068428 | -2.24469 |
| BU439010  | A_87_P041884 | -0.64843 | 6.582341 | -4.29184 | 0.003667 | 0.054504 | -1.79513 |

|           |              |          |          |          |          |          |          |
|-----------|--------------|----------|----------|----------|----------|----------|----------|
| BU377193  | A_87_P041674 | -0.65849 | 7.32051  | -4.3789  | 0.003299 | 0.051561 | -1.6835  |
| BLMH      | A_87_P038228 | -0.67959 | 9.45922  | -3.6212  | 0.008609 | 0.086891 | -2.69318 |
| LOC415445 | A_87_P019604 | -0.6832  | 10.07785 | -4.60875 | 0.002508 | 0.043866 | -1.39442 |
| GSTA1     | A_87_P009500 | -0.68823 | 11.77119 | -4.735   | 0.002165 | 0.04086  | -1.23913 |
| BU308605  | A_87_P030119 | -0.70728 | 9.532341 | -4.86231 | 0.00187  | 0.037936 | -1.08502 |
| TC193162  | A_87_P007669 | -0.73154 | 11.02518 | -3.51321 | 0.009939 | 0.093915 | -2.84375 |
| CR523709  | A_87_P011424 | -0.73624 | 6.544542 | -3.99795 | 0.005286 | 0.066299 | -2.18051 |
| CPB1      | A_87_P022185 | -0.74417 | 9.01057  | -3.96849 | 0.005487 | 0.067694 | -2.21985 |
| MLF1      | A_87_P010877 | -0.74734 | 6.256189 | -4.06577 | 0.004852 | 0.063199 | -2.09041 |
| LOC425610 | A_87_P024269 | -0.82095 | 10.08882 | -6.11773 | 0.000497 | 0.021228 | 0.305465 |
| SLC37A2   | A_87_P023260 | -0.82436 | 9.498505 | -5.155   | 0.001348 | 0.032747 | -0.74014 |
| CR389681  | A_87_P014658 | -0.82438 | 10.46053 | -5.03106 | 0.001546 | 0.035058 | -0.88458 |
| TC220248  | A_87_P002700 | -0.865   | 7.208018 | -4.18619 | 0.004176 | 0.058359 | -1.93215 |
| NOXO1     | A_87_P010984 | -0.87278 | 6.788754 | -4.89746 | 0.001797 | 0.037082 | -1.04291 |
| LOC430670 | A_87_P021646 | -0.92931 | 8.782912 | -3.48922 | 0.010264 | 0.095674 | -2.87741 |
| TC199001  | A_87_P006979 | -0.93249 | 9.871338 | -4.35674 | 0.003388 | 0.052238 | -1.7118  |
| TC197901  | A_87_P007125 | -0.9559  | 9.163066 | -6.53146 | 0.000335 | 0.0171   | 0.715681 |
| LOC418850 | A_87_P010115 | -0.96211 | 6.268512 | -6.93752 | 0.000232 | 0.014825 | 1.097286 |
| CR523002  | A_87_P011912 | -0.97241 | 9.70337  | -5.90625 | 0.000613 | 0.023183 | 0.087002 |
| BU273071  | A_87_P031048 | -0.98347 | 7.72065  | -7.04131 | 0.000211 | 0.014372 | 1.191642 |
| BU417024  | A_87_P039183 | -1.00518 | 6.133697 | -4.58701 | 0.002573 | 0.044571 | -1.42141 |
| LOC422306 | A_87_P030446 | -1.00923 | 7.996071 | -4.44574 | 0.003044 | 0.049181 | -1.5986  |
| CR385677  | A_87_P016995 | -1.03353 | 7.449435 | -7.16842 | 0.000189 | 0.013611 | 1.30549  |
| SOCS3     | A_87_P037625 | -1.04345 | 11.52355 | -7.83365 | 0.000108 | 0.011582 | 1.872084 |
| CR387293  | A_87_P015918 | -1.0473  | 9.202857 | -4.94264 | 0.001708 | 0.036196 | -0.98907 |
| GNPDA1    | A_87_P036824 | -1.05309 | 9.819387 | -7.22429 | 0.00018  | 0.013242 | 1.354944 |
| TC191392  | A_87_P034248 | -1.05445 | 6.120014 | -5.63085 | 0.000812 | 0.026247 | -0.20677 |

|             |              |          |          |          |          |          |          |
|-------------|--------------|----------|----------|----------|----------|----------|----------|
| TC206107    | A_87_P004587 | -1.07734 | 9.360992 | -5.20482 | 0.001277 | 0.031737 | -0.68272 |
| FABP3       | A_87_P021934 | -1.08481 | 10.53447 | -5.41343 | 0.00102  | 0.028699 | -0.44634 |
| LOC418700   | A_87_P019694 | -1.09423 | 7.713938 | -6.14461 | 0.000484 | 0.021039 | 0.332801 |
| FABP3       | A_87_P021933 | -1.09954 | 9.764458 | -5.37064 | 0.001067 | 0.029171 | -0.4943  |
| K123        | A_87_P008724 | -1.10435 | 7.23779  | -3.64448 | 0.008348 | 0.08548  | -2.66092 |
| CO764135    | A_87_P019795 | -1.11702 | 8.928574 | -7.36333 | 0.00016  | 0.012903 | 1.476499 |
| LOC395210   | A_87_P017952 | -1.12457 | 7.102583 | -3.67722 | 0.007996 | 0.083547 | -2.61569 |
| BU123654    | A_87_P034186 | -1.1325  | 7.78349  | -6.76399 | 0.000271 | 0.015631 | 0.936664 |
| BU129127    | A_87_P034022 | -1.14673 | 7.144141 | -5.68129 | 0.00077  | 0.025694 | -0.15216 |
| TC193806    | A_87_P007610 | -1.15524 | 8.416028 | -5.51211 | 0.000919 | 0.027501 | -0.33676 |
| BU308605    | A_87_P030118 | -1.15963 | 8.052488 | -7.35817 | 0.000161 | 0.012903 | 1.472026 |
| TC208562    | A_87_P003961 | -1.1715  | 8.650317 | -8.16295 | 8.36E-05 | 0.01028  | 2.135462 |
| CPA2        | A_87_P019171 | -1.19304 | 10.21274 | -7.22461 | 0.00018  | 0.013242 | 1.355227 |
| MORF4L1     | A_87_P016244 | -1.21334 | 10.55829 | -8.95579 | 4.61E-05 | 0.007893 | 2.727358 |
| LOC415531   | A_87_P024595 | -1.25317 | 8.695207 | -7.5717  | 0.000134 | 0.012278 | 1.654666 |
| LOC418790   | A_87_P021778 | -1.26211 | 12.14388 | -5.58145 | 0.000854 | 0.026962 | -0.2606  |
| FGG         | A_87_P037916 | -1.26612 | 7.065645 | -3.9744  | 0.005446 | 0.067472 | -2.21195 |
| NUDT6       | A_87_P032440 | -1.3054  | 8.152001 | -7.74807 | 0.000116 | 0.011792 | 1.801845 |
| BU296863    | A_87_P030431 | -1.33615 | 7.194878 | -8.04293 | 9.18E-05 | 0.010646 | 2.04072  |
| RCJMB04_7d1 | A_87_P036816 | -1.36416 | 10.38491 | -7.3388  | 0.000163 | 0.012907 | 1.455208 |
| CR389027    | A_87_P015076 | -1.40327 | 7.508749 | -8.34936 | 7.24E-05 | 0.009762 | 2.279839 |
| CR353647    | A_87_P017801 | -1.44055 | 7.063261 | -8.35125 | 7.23E-05 | 0.009762 | 2.281287 |
| LOC395708   | A_87_P008896 | -1.51078 | 8.434461 | -10.2293 | 1.94E-05 | 0.005308 | 3.567948 |
| BU490772    | A_87_P025233 | -1.51876 | 7.050169 | -7.14629 | 0.000193 | 0.013667 | 1.285797 |
| TC202539    | A_87_P006253 | -1.65108 | 9.717155 | -9.38224 | 3.41E-05 | 0.007046 | 3.023013 |
| GSTT1       | A_87_P009143 | -1.72659 | 10.94061 | -13.3304 | 3.34E-06 | 0.003197 | 5.174319 |
| CV862752    | A_87_P009844 | -1.77023 | 9.642913 | -8.25653 | 7.77E-05 | 0.010095 | 2.208356 |

|               |              |          |          |          |          |          |          |
|---------------|--------------|----------|----------|----------|----------|----------|----------|
| 1700012B18RIK | A_87_P011567 | -1.807   | 11.22739 | -9.35119 | 3.49E-05 | 0.007046 | 3.001986 |
| LOC418060     | A_87_P021136 | -1.84282 | 7.909738 | -9.5263  | 3.09E-05 | 0.006739 | 3.119545 |
| PRSS3         | A_87_P009139 | -1.94406 | 6.613198 | -5.03242 | 0.001544 | 0.035058 | -0.88299 |
| LOC427054     | A_87_P036130 | -2.14877 | 9.837849 | -14.7484 | 1.69E-06 | 0.002739 | 5.750472 |
| PNLIP         | A_87_P023861 | -2.21791 | 10.82498 | -5.50991 | 0.000921 | 0.027504 | -0.33919 |
